# Supplementary material
Source: PubMed Central journal article supplement (PMC6084768)
Supplement: mmc2.pdf [file mmc2.pdf]

# A Fluorescence Correlation Spectrometer for Measurements in Cuvettes

Bankanidhi Sahoo,<sup>1</sup> Timir Baran Sil,<sup>1</sup> Biswajit Karmakar,<sup>2</sup> and Kanchan Garai<sup>1,\*</sup>

<sup>1</sup>Tata Institute of Fundamental Research, Serilingampally, Hyderabad, India and <sup>2</sup>Saha Institute of Nuclear Physics, Kolkata, India

**ABSTRACT** We have developed a fluorescence correlation spectroscopy (FCS) setup for performing single-molecule measurements on samples inside regular cuvettes. The cuvette FCS uses a horizontally mounted extra-long working distance, 0.7 NA, air objective with a working distance of  $>1.8$  mm instead of a high NA water or oil immersion objective. The performance of the cuvette FCS is found to be highly sensitive to the quality and alignment of the cuvette. The radial resolution and effective observation volume obtained using the optimized setup are  $\sim 340$  nm and 1.8 fL, respectively. The highest molecular brightness and the signal/noise ratio in the autocorrelation data achieved using an aqueous solution of rhodamine B are greater than 44 kHz and 110, respectively. Here, we demonstrate two major advantages of cuvette FCS. For example, the cuvette FCS can be used for measurements over a wide range of temperatures that is beyond the range permitted in the microscope-based FCS. Furthermore, cuvette FCS can be coupled to automatic titrators to study urea-dependent unfolding of proteins with unprecedented accuracy. The ease of use and compatibility with various accessories will enable applications of cuvette FCS in the experiments that are regularly performed in spectrofluorometers but are generally avoided in microscope-based FCS.

## INTRODUCTION

Fluorescence correlation spectroscopy (FCS) is a powerful single-molecule technique with widespread applications in biophysics. FCS is widely used in measurements of molecular size, chemical kinetics, conformational dynamics of biomolecules, protein-ligand interactions, and protein aggregation (1–4). There have been extensive developments over the past two decades to extend the applications of FCS in live cells and tissue samples. For example, several flavors of imaging FCS techniques have been developed for measurements of membrane dynamics, cellular and nuclear localization, and transport of biomolecules in live cells (5–8). Furthermore, development of two-photon FCS has extended applications of FCS in tissues and other thick samples (9).

Conventionally, FCS modules are attached to confocal microscopes for the high spatial resolution and the signal/noise ratio (S/N) achieved in confocal microscopy. Consequently, applications of FCS have several limitations in many of the biophysical experiments. For example, the folding and unfolding of proteins using chemical or thermal denaturation are rarely studied using FCS (10–12). Kinetic

experiments that require stirring of the samples cannot be performed using microscope-based FCS setups. Furthermore, experiments that require nonaqueous or corrosive solvents are seldom performed using FCS (13). However, these experiments are performed regularly in most biophysics and biochemistry laboratories using spectrofluorometers. Therefore, an FCS setup capable of performing measurements inside a cuvette with high S/N can enable applications of FCS in a large number of biophysical experiments.

A major obstacle for performing FCS in a cuvette is that the thickness of the optical windows of commercially available cuvettes is  $\sim 1.25$  mm. Conventional FCS setups employ high numerical aperture ( $NA \geq 1.2$ ) objective lenses, which are carefully corrected for both spherical and chromatic aberrations. However, these objectives have working distances of less than 0.31 mm and hence cannot be used for measurements inside cuvettes. Although the high NA objectives are required to achieve high S/N, FCS measurements using low NA optics have been reported earlier on a few occasions. For example, Garai et al. performed FCS measurements using a single-mode optical fiber with  $NA = 0.13$  for detection of amyloid aggregates inside a centrifuge tube (14). Altamore et al. used a low NA ( $NA = 0.4$ ), long working distance objective to perform scanning FCS measurements inside glass test tubes for single-particle detection and characterization of bacteria (15). However,

Submitted April 16, 2018, and accepted for publication May 29, 2018.

\*Correspondence: [kanchan@tifrh.res.in](mailto:kanchan@tifrh.res.in)

Editor: Jochen Mueller.

<https://doi.org/10.1016/j.bpj.2018.05.038>

© 2018 Biophysical Society.

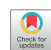

these experiments are applicable only for characterization of highly bright and large particles because of the poor S/N of the FCS data. More recently, Banachowicz et al. have shown that with careful adjustment of the correction collar, extra-long working distance (ELWD) objectives with  $NA \geq 0.4$  can be used with thick cover slides to obtain reasonable-quality FCS data from aqueous solutions of Alexa488 (16). However, the S/Ns obtained in these measurements were shown to be low, requiring averaging of the autocorrelation data for  $\sim 30$  min.

In this article, we have investigated whether ELWD objectives can be used for FCS experiments inside regular cuvettes. We envision that for cuvette FCS to become a popular single-molecule technique, it must be highly sensitive for fast and accurate measurements of the autocorrelation function (ACF). Furthermore, it must be easy to use, and the measurements must be robust. Here, we report building a highly sensitive setup suitable for performing FCS measurements inside regular cuvettes. We have characterized the factors that critically affect the performance of the cuvette FCS setup. Our setup can yield a molecular brightness of  $>44$  kHz,  $S/N > 110$ , and a diffusion time ( $\tau_D$ ) of  $\sim 63$   $\mu$ s for rhodamine B in phosphate-buffered saline (PBS) at pH 7.4. The effective observation volume obtained in this setup is  $\sim 1.8$  fL.

## Theory

The performance of an FCS setup is characterized by two important parameters, viz the spatial resolution and the S/N of the ACF. Because we are using an air objective but the samples are in aqueous media, the effects of the optical aberrations due to refractive index mismatch also need to be considered carefully. These aspects have been studied extensively both theoretically and experimentally by several groups (17–21). A brief overview of the theory relevant to the characterization of the cuvette FCS setup is presented here.

### Resolution in FCS

Like all the microscope-based FCS setups, the cuvette FCS is also built using a confocal detection scheme (see Fig. 1). The point-spread function (PSF) of a confocal observation volume is generally approximated by a three-dimensional (3D) Gaussian (22) as follows:

$$PSF(r, z) = I(0, 0) \exp\left(-\frac{2r^2}{\sigma_r^2} - \frac{2z^2}{\sigma_z^2}\right). \quad (1)$$

$I(0, 0)$  is the peak intensity, and  $\sigma_r$  and  $\sigma_z$  are the radial and the axial dimensions of the PSF, respectively. The resolution of confocal detection is critically dependent on the NA of the objective and the size of the pinhole. Both the radial and the axial resolution improve with an increase of NA; hence, high NA objectives are preferred in FCS (23).

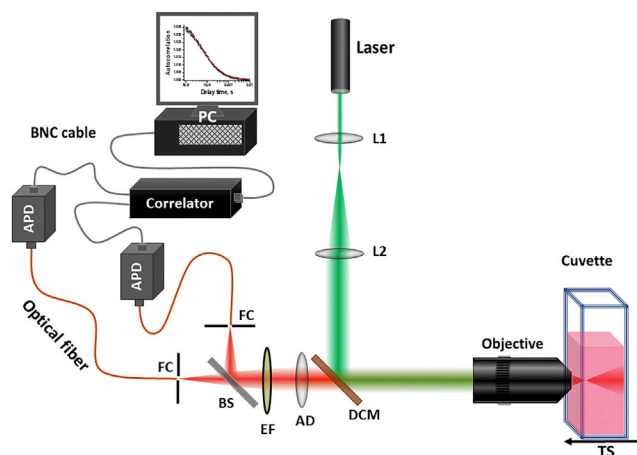

FIGURE 1 Schematic of the cuvette FCS setup. Laser (543 nm, CW), L1, L2: lenses, L1 is aspheric lens; DCM, dichroic mirror; AD, achromatic doublet lens; EF, emission filter; BS, 50/50 beam splitter; FC, fiber coupler; TS, micrometer translation stage; Objective, ELWD, air objective, 0.7 NA, WD = 2.6–1.8 mm. To see this figure in color, go online.

Although smaller pinholes increase the resolution, they also reduce the collection efficiency of fluorescence, leading to poor S/N. Hence, the size of the pinhole is decided by considering both resolution and S/N. Typically, the recommended size of the pinhole is about the size of the Airy disc unit (AU) (23). Considering a 0.7 NA, 60 $\times$  air objective, and  $\lambda = 580$  nm, 1 AU at the image plane is

$$1 \text{ AU} = \frac{1.22 \lambda}{NA} \times \text{magnification} \cong \frac{1.22 \times 0.580 \times 60}{0.7} = 61 \mu\text{m}. \quad (2)$$

The ACF of a freely diffusing species in a perfectly 3D Gaussian PSF can be expressed analytically by the following expression (24):

$$G(\tau) = \frac{1}{\langle N \rangle} \left( \frac{1}{1 + \frac{\tau}{\tau_D}} \right) \left( \frac{1}{1 + \frac{\tau}{\omega^2 \tau_D}} \right)^{\frac{1}{2}}, \quad (3)$$

where  $\langle N \rangle$  is the average number of fluorophore molecules in the effective confocal observation volume ( $V_{eff}$ ),  $\omega$  is the structure parameter (i.e.,  $\omega = \sigma_z/\sigma_r$ ), and  $\tau_D$  is the diffusion time of the particle in the solution. Experimentally,  $V_{eff}$  can be estimated from  $\langle N \rangle$  if the concentration ( $C$ ) of the sample is known, as follows:

$$V_{eff} = \frac{\langle N \rangle}{C \times N_{Av}}, \quad (4a)$$

where  $N_{Av}$  is the Avogadro number and  $C$  is the molar concentration. It may be noted here that the volume of the PSF ( $V_{PSF}$ ) is proportional to the  $V_{eff}$ . The proportionality

constant, commonly known as the  $\gamma$ -factor, is equal to  $1/(2\sqrt{2})$  for a 3D Gaussian PSF (25). Because the FCS observation volume is an ellipsoid,  $V_{eff}$  is dependent on the  $\sigma_r$  and  $\sigma_z$  by the following relation:

$$V_{eff} = \pi^2 \sigma_r^2 \sigma_z. \quad (4b)$$

The radial resolution of the FCS observation volume can be estimated from the measured value of the  $\tau_D$ , as follows:

$$\tau_D = \frac{\sigma_r^2}{4D}, \quad (4c)$$

where  $D$  is the diffusion coefficient of the molecule in the solution. It is clear in Eqs. 3 and 4, *a-c* that the measured ACF of a fluorophore with known  $C$  and  $D$  can be analyzed to obtain  $V_{eff}$ ,  $\sigma_r$ ,  $\sigma_z$ , and hence, the dimensions of the confocal volume. The  $\omega$  can be obtained from fitting the ACF with Eq. 3, or it can be calculated from the ratio of  $\sigma_z$  and  $\sigma_r$  using Eq. 4, *a-c*. The values of  $\omega$  determined using the two independent approaches would be the same if the 3D Gaussian approximation of the PSF holds truly (26).

#### Optical aberrations in FCS

Although the PSF in the confocal setup is approximated by a 3D Gaussian, it can deviate significantly in presence of mismatch of refractive indices (RIs) between the immersion and the sample media. Because we are using an air objective (RI = 1.0) but the samples used are in aqueous buffer (RI = 1.33), the optical aberrations in cuvette FCS need to be investigated carefully. Optical aberrations in the above-mentioned case have not been characterized earlier, but the aberrations in the case of high NA (NA = 1.3) oil immersion (RI = 1.54) objective being used in confocal imaging of samples in aqueous media have been characterized extensively both theoretically and experimentally (17,27). Because the PSFs were calculated numerically, below we summarize the important observations of these studies qualitatively. 1) The spherical aberrations increase with increasing depth of focal spot inside the sample, 2) the peak intensity of the PSF drops rapidly, 3) the  $\sigma_r$  remains almost unaffected, but 4) the  $\sigma_z$  increases almost linearly with the ratio of the RIs of the two media. However, the aberrations are small when a low NA (NA = 0.8) objective is used (17). Whereas most of the earlier reports have used imaging to characterize the aberrations in the confocal PSF, here we have used FCS measurements to do that (see Eqs. 3 and 4). Furthermore, Hess and Webb have shown that the assumption of a perfectly Gaussian PSF is not valid in FCS setups, particularly when high NA objectives are used. They proposed that this can be tested by measuring the photon count rate per molecule (CPM) as a function of the size of the pinhole (26). The CPM can be easily calculated in FCS experiments from the total count rate (CR) and the  $\langle N \rangle$  (e.g.,  $CPM = CR/\langle N \rangle$ ).

#### S/N in FCS

Detailed theoretical and experimental investigations of the S/N in the ACF have been presented earlier in several pioneering articles (20,21,28). Qualitatively, if the  $\tau \times CPM \ll 1$ , then the S/N in the ACF at any correlation time,  $\tau$ , depends primarily on two parameters: the average number of photons detected within  $\tau$  and the total time of acquisition ( $T$ ), giving rise to the following relationship (25):

$$\frac{S}{N} \approx CPM \times T^{0.5}. \quad (5)$$

Therefore, the S/N in FCS can be improved by using a longer acquisition time ( $T$ ) or by maximizing the CPM.

## MATERIALS AND METHODS

### Building the cuvette FCS setup

Fig. 1 shows the schematic of the cuvette FCS setup. All the optics and the optomechanical components, unless mentioned otherwise, are purchased from Thorlabs (Newton, NJ). The FCS setup is built using a 30 mm cage system. The cage rods define the geometry of the setup, and the cage plates are used for mounting the optics. The excitation laser used here is a green ( $\lambda = 543$  nm) He-Ne laser (Melles Griot, Carlsbad, CA). The laser beam is expanded to 12 mm by using a pair of lenses, viz, L1 and L2, with focal lengths of 25 and 200 mm, respectively. L1 is an aspheric lens. The objective used is an ELWD, 60 $\times$ , 0.7 NA air objective (CFI S Plan Fluor ELWD 60 $\times$ ) from Nikon Instruments (Melville, NY). The dichroic mirror is an ultraflat dual bandpass (part number ZT488/543rpc) from Chroma Technology (Bellows Falls, VT). The cuvette holder is made at the machine shop at Tata Institute of Fundamental Research, Hyderabad, India. It is custom designed such that it is compatible with the 30 mm cage system (Fig. S1). A home-built temperature controller was used to maintain the temperature of the cuvette holder. The cuvette holder is mounted on a micrometer translation stage (TS) for adjusting the distance between the objective and cuvette. The fluorescence collected by the objective is focused at a pinhole using an achromatic doublet lens ( $f = 200$  mm). The fluorescence is split into two channels using a 50/50 beam splitter. A multimode optical fiber (diameter = 50  $\mu$ m) is used as a pinhole in each confocal detection channel. The optical fibers are mounted on X-Y-Z micrometer stages for precision positioning of the pinhole. The detectors used are avalanche photodiodes from Excelitas Technologies (Covina, CA). The emission filter is a band-pass filter ( $607 \pm 35$  nm) from Semrock (Rochester, NY). The correlator card is from <http://correlator.com>.

### Fluorescence labeling of proteins

An N-terminal fragment of apoE4 (Nt-apoE4) and  $\alpha$ -synuclein are expressed and purified, as described elsewhere (29,30). The T4-lysozyme is a kind gift from Subhendu Pandit and Dr. Pramodh Vallurupalli at the Tata Institute of Fundamental Research, Hyderabad. Bovine serum albumin (BSA) is purchased from Sigma Aldrich (St. Louis, MO). The cysteine residues in Nt-apoE4 (A102C) and  $\alpha$ -synuclein (A69C) are labeled using tetramethylrhodamine (TMR) maleimide. T4-lysozyme and BSA are labeled at the N-terminal amine using 5/6-carboxy-TMR succinimidyl ester. The unreacted dye is removed by size-exclusion chromatography using a Superdex 200 column (GE Healthcare, Little Chalfont, UK) in PBS buffer. Amylin is synthesized by solid-phase peptide synthesis using standard fmoc chemistry. TMR is attached to the N-terminal amine of amylin using

5 (6)-carboxytetramethylrhodamine on the resin. The TMR amylin is purified by size-exclusion chromatography using a Superdex peptide column (GE Healthcare) and PBS as the running buffer. The purity of the proteins and the peptide are verified by mass spectrometry. TMR-5-maleimide and 5/6-carboxytetramethylrhodamine succinimidyl ester are purchased from Thermo Fisher Scientific (Waltham, MA). All other chemicals are purchased from Sigma. The cuvette used for most of the cuvette FCS measurements is from Hellma (catalog number 101-10-40; Hellma, Plainview, NY).

## Analysis of the FCS data

The ACF data are fitted by assuming a single diffusing species using Eq. 3. The values of  $\langle N \rangle$  and  $\tau_D$  obtained from the fitting are used to calculate the  $V_{eff}$ ,  $\sigma_r$ , and  $\sigma_z$  of the FCS observation volume using Eq. 4, *a-c*. The CPM is estimated from the CR and the  $\langle N \rangle$ .

## FCS measurements as a function of the depth of the focal spot inside the cuvette

The depth of the FCS observation volume inside the sample is changed by moving the cuvette holder with a micrometer stage (TS in Fig. 1). In Fig. 2 A, the distances shown are measured from the inner surface of the wall of the cuvette. The surface is located by observing the bright reflection of the focused excitation laser from this surface.

## Measurement of angular misalignment of the cuvette

Although the cuvette holder is designed to ensure compatibility with the cage system of the FCS setup, a small amount of angular displacement of the cuvette holder is still possible. This is due to the slightly larger internal diameter of the holes in the cuvette holder than the outer diameter of the cage rods. The angular position of the cuvette holder can be adjusted using two Teflon screws that are used also for mounting the cuvette holder to the cage plate in the cage system. Because the overall angular displacement ( $\theta$ ) is very small, it is measured using the deflection of a laser beam that is reflected from the optical window of the cuvette on a screen (Fig. S2).

## The FCS measurements at different excitation powers and different concentrations of rhodamine B

The power of excitation light reaching the sample was measured by measuring the power of the incident laser light right after the objective using a power meter (Newport, Irvine, CA). The intensity of the excitation beam was modulated by using neutral density filters. The optical densities of the filters used in our experiments are 0, 0.2, 0.3, 0.4, 0.5, 0.6, 0.7, 0.8, 0.9, 1.0, 1.3, and 1.6. To calculate the S/N, the SD and the mean of  $G(\tau)$  at each  $\tau$  are calculated from 10 identical measurements of  $G(\tau)$  using 114, 56, 28, and 14  $\mu\text{W}$  of excitation laser power. The S/N is calculated using the following relationship:  $S/N = \langle G(\tau) \rangle / SD$ .

For the concentration-dependence experiments, a stock solution of 10  $\mu\text{M}$  rhodamine B was prepared in water. The stock was diluted to the final concentrations of 3, 4, 5, 7, 10, 21, 31, 42, 52, 62, 83, 104, 124, 145, 165, 205, and 245 nM in PBS (pH 7.4) buffer.

## Measurements in commercial microscope-based FCS

We have used a PicoQuant FCS module integrated with an Olympus confocal microscope (Olympus Fluoview FV3000; Olympus, Tokyo,

Japan) installed recently at the Tata Institute of Fundamental Research. For our experiments, in this setup, we have used a solid-state laser at 561 nm (Coherent, Santa Clara, CA), a water immersion objective with NA = 1.2, and a pinhole size of 1 AU. It may be noted here that the wavelength of the lasers used in cuvette FCS and the PicoQuant FCS are somewhat different. However, the extinction coefficient of rhodamine B at 543 and 561 nm are quite similar.

## FCS measurements at different temperatures

The design of the homebuilt cuvette holder is shown in Fig. S1. In our setup, the temperature of the holder and the sample is found to be equal within a range of 15–60°C, and it can be controlled within  $\pm 0.4^\circ\text{C}$ . Therefore, here FCS measurements were performed in this range of temperature. At each temperature, a total of 10 autocorrelation traces of a duration of 30 s are recorded. The *z*-position of the cuvette is optimized for the best CPM at each temperature. The viscosity of water as a function of temperature is reported elsewhere (31).

## FCS measurements at different concentrations of urea

Urea denaturation experiments were carried out with the help of an autotitrator coupled to the cuvette FCS setup. The autotitrator (ATS-530; Jasco, Easton, MD) is operated by the software of a Jasco spectrofluorometer. The autotitrator uses two syringes: one for injecting a defined  $\mu\text{L}$  volume of 10 M urea solution into the sample and the other for withdrawing an equal amount of solution from the cuvette. We have used a total of 24 injections/withdrawals of 100  $\mu\text{L}$  each for the data presented in Fig. 6 and a total of 77 injections/withdrawals of 32  $\mu\text{L}$  each for the data presented in Fig. 7 to vary the concentration of urea in the sample from 0 to 7 M. The sample is mixed for 90 s immediately after injection using a teflon-coated magnetic bead with the help of a magnetic stirrer. The magnetic stirrer is then stopped for 10 min for performing the FCS measurements. The start and stop of stirring is controlled by a timer (Selec, Navi Mumbai, Maharashtra, India). Hence, the entire experiment is performed in an automatic manner. At each concentration of urea, 20 recordings of 30 s each were collected. However, the first six autocorrelations were not used for analysis to avoid artifacts that may arise because of residual flow in the sample after stopping the stirrer. The viscosity of urea used in the analysis is reported elsewhere (32). The data presented in Figs. 6 and 7 are the averages of three independent experiments. The  $R_h$  of TMR-labeled Nt-apoE4 was calculated using the following expression:

$$R_{h, \text{Nt-apoE4}} = \frac{R_{h, \text{rhodamine B}} \times \tau_{D, \text{Nt-apoE4}}}{\tau_{D, \text{rhodamine B}}} \quad (6)$$

The  $R_h$  of rhodamine B is known to be 0.57 nm (33). We note here that the fluorophore is diluted during each injection/withdrawal cycle. The plot of  $\langle N \rangle$  in Fig. 6 A is corrected by the dilution factor.

To calculate the unfolded fraction ( $F_u$ ) of the protein as a function of the concentration of urea, the  $G(\tau)$  data are fitted using the two-component diffusion model:

$$G(\tau) = g_f \left( \frac{1}{1 + \frac{\tau}{\tau_{Df}}} \right) \left( \frac{1}{1 + \frac{\tau}{\omega^2 \tau_{Df}}} \right)^{\frac{1}{2}} + g_u \left( \frac{1}{1 + \frac{\tau}{\tau_{Du}}} \right) \left( \frac{1}{1 + \frac{\tau}{\omega^2 \tau_{Du}}} \right)^{\frac{1}{2}} \quad (7a)$$

The suffixes  $f$  and  $u$  correspond to folded and unfolded proteins, respectively. Assuming that the molecular brightness of the folded and the unfolded proteins are the same,  $g_f$  (or  $g_u$ ) can be expressed in terms of  $\langle N_f \rangle$  and  $\langle N_u \rangle$  by the following relation (34):

$$g_{f,u} = \frac{\langle N_{f,u} \rangle}{(\langle N_f \rangle + \langle N_u \rangle)^2}. \quad (7b)$$

It may be seen from Fig. 7 A that  $\tau_{Du}/\tau_{Df} = 520/300 \sim 1.7$  for Nt-apoE4. Hence, it is difficult to resolve the folded and the unfolded species using the two-component model, particularly when the ratio of  $\langle N_f \rangle$  and  $\langle N_u \rangle$  is significantly less or greater than 1.0 (35). Therefore, fitting of  $G(\tau)$  with Eq. 7 a leads to redundancies in the determination of the values of both  $\langle N \rangle$  and  $\tau_D$ . To circumvent this problem, we fix the values of both  $\tau_{Du}$  and  $\tau_{Df}$  while fitting the  $G(\tau)$  data with Eq. 7 a. Here, we have used  $\tau_{Df}/\eta_{rel} = 300 \mu s$  and  $\tau_{Du}/\eta_{rel} = 520 \mu s$  (see Fig. 7 A). Because  $\tau_D$  increases linearly with viscosity ( $\eta$ ), the values of  $\tau_{Df}$  and  $\tau_{Du}$  are scaled with relative viscosity ( $\eta_{rel} = \eta_{urea}/\eta_{water}$ ) of the urea solution. The fraction of unfolded proteins ( $F_u$ ) at any concentration of urea is estimated as follows:  $F_u = g_u/(g_u + g_f)$ . The  $F_u$  values as a function of urea are fitted using a two-state model (36) to evaluate the free energy ( $\Delta G$ ) and the “m” value of folding of the protein.

## Ensemble measurement of fluorescence of rhodamine B

Dependence of quantum yield (QY) of rhodamine B on temperature and urea has been measured using a spectrofluorometer (Jasco) equipped with a temperature-controlled cell holder and coupled to an autotitrator. The excitation was set at 543 nm, and the emission was set at 580 nm. In the case of the experiment with urea, the total fluorescence is corrected appropriately with the dilution factor arising from dilution of the sample due to injection of urea and withdrawal of the sample by the autotitrator.

## Unfolding of Nt-apoE4 by circular dichroism

Urea dependent unfolding of 1  $\mu M$  Nt-apoE4 prepared in PBS buffer is performed at 25°C in a spectropolarimeter (Jasco) coupled with an autotitrator (Jasco). The concentrations of urea in the protein solution is increased by withdrawal of a fixed  $\mu L$  volume of the solution followed by injection of the same volume of 10 M urea. Because the protein is diluted during each withdrawal/injection cycle, the measured circular dichroism (CD) signal is finally corrected for the dilution. Because Nt-apoE4 is a helical protein, the CD is monitored at 225 nm.

## RESULTS

### The cuvette FCS setup

Fig. 1 shows the schematic of the cuvette FCS setup. This setup is similar to the conventional FCS setup, with two major differences. First, the objective is mounted horizontally. Such geometry is required for FCS measurements inside a cuvette. Second, we have used a commercially available ELWD plan fluor air objective with an NA equal to 0.7. These objectives are corrected for both spherical and chromatic aberrations, but the corrections are less extensive than the plan apochromat objectives. However, the advantage of using the ELWD objective is that its working distance is  $>1.8$  mm and that the correction collar can be

adjusted for cover glasses of thicknesses up to 1.3 mm. The ELWD objectives have been used earlier to perform FCS measurements on thick cover glass (16). However, the reported S/Ns of the ACF were poor.

### Optimization of the performance of the setup

We then investigate the factors that affect the performance of the cuvette FCS most critically. The resolution of the cuvette FCS is characterized by  $\sigma_r$  and  $V_{eff}$  of the observation volume and the sensitivity by S/N of the ACF ( $G(\tau)$ ). To evaluate these factors, we have performed FCS measurements on a solution of rhodamine B in PBS at 25°C. The  $G(\tau)$  data are analyzed to determine  $\langle N \rangle$ ,  $\tau_D$ ,  $\omega$ , and the CPM of the fluorophore in the FCS observation volume using Eq. 3. All the  $G(\tau)$  data along with the fits are presented in Fig. S3.  $V_{eff}$  and  $\sigma_r$  are then estimated from  $\langle N \rangle$  and  $\tau_D$ , as discussed in Eq. 4, a–c. We use CPM as a qualitative measure of S/N (see Eq. 5). In all of our experiments, the correction collar of the objective is fixed according to thickness of the wall of the cuvette, i.e., for thicknesses equal to 1.25 mm.

First, we characterize how the performance of cuvette FCS depends on the depth of the focal spot inside the cuvette. Fig. 2 A shows that  $\langle N \rangle$  and  $\tau_D$  are nearly constant when the depth is less than 25  $\mu m$  but increase rapidly thereafter. Because  $\langle N \rangle$  and  $\tau_D$  are proportional to  $V_{eff}$  and  $\sigma_r^2$ , respectively, both the axial and the radial resolution remain nearly unchanged if the depth of the focus is less than 25  $\mu m$ , but it worsens rapidly beyond this distance. The

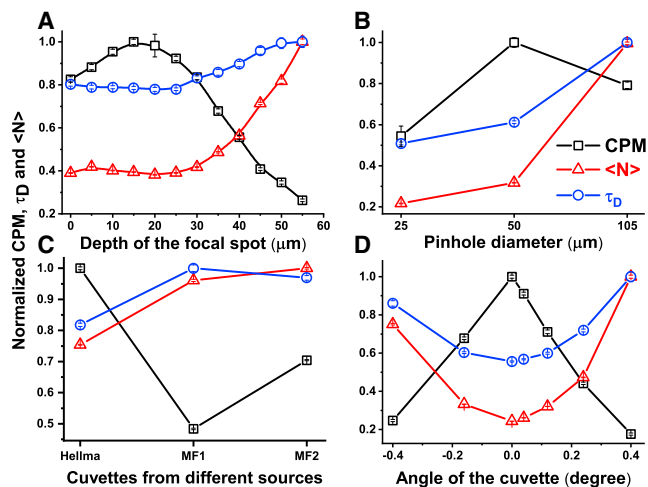

FIGURE 2 Optimization of the performance of the cuvette FCS. The effects of focal depth (A), pinhole size (B), cuvette quality (C), and angular alignment of the cuvette (D) are shown.  $G(\tau)$  and CR data obtained from aqueous solution of rhodamine B are analyzed to estimate  $\langle N \rangle$ ,  $\tau_D$ , and CPM. The squares, triangles, and circles represent normalized CPM,  $N$ , and  $\tau_D$  respectively. Clearly,  $\langle N \rangle$  and  $\tau_D$  remain almost unchanged if the focal depth is  $<25 \mu m$ . The smallest  $\langle N \rangle$  and  $\tau_D$  are obtained with a 25  $\mu m$  pinhole, but the highest CPM is obtained with a 50  $\mu m$  pinhole. To see this figure in color, go online.

same figure shows that the CPM is the highest at a depth of 15  $\mu\text{m}$ , but it decreases on either side of 15  $\mu\text{m}$ . The results presented above are consistent with the observations reported by Hell et al., which found that the effects of focal depth on the axial and the radial resolutions are small even in the presence of mismatch of RIs in the case of low NA (NA = 0.8) objectives (17). Furthermore, Hell et al. showed that the peak intensity of the PSF falls sharply with the depth of the focal spot (17). It is unclear why the CPM shows a peak at a depth of 15  $\mu\text{m}$  instead of at a depth equal to zero. We think that for distances very close to the cuvette, aberrations may be introduced because of partial focusing of the excitation inside the wall of the cuvette. Taken together, the data presented in Fig. 2 A indicate that the confocal PSF in cuvette FCS remains nearly unchanged if the focal spot is kept within 25  $\mu\text{m}$ . Therefore, we keep the depth of focus at nearly 15  $\mu\text{m}$  in all of our FCS experiments.

We then examine the effects of the size of the confocal pinhole on the FCS data using multimode optical fibers of different diameters. Diameters of the fibers used are 25, 50, and 105  $\mu\text{m}$ . Fig. 2 B shows that both  $\langle N \rangle$  and  $\tau_D$  increase with increasing size of the pinholes. This is expected, as larger pinholes are expected to increase both  $\sigma_r$  and  $\sigma_z$  (23,26). Although  $\langle N \rangle$  and  $\tau_D$ , which are obtained using the 25  $\mu\text{m}$  fiber, are the smallest, the corresponding values obtained using the 50  $\mu\text{m}$  fiber are only slightly ( $\sim 10\%$ ) larger. However, the CPM obtained using the 25  $\mu\text{m}$  fiber is  $\sim 50\%$  lower than that obtained with the 50  $\mu\text{m}$  fiber. Because in our setup 1 AU is  $\sim 61 \mu\text{m}$ , decreasing the size of the pinhole below 50  $\mu\text{m}$  leads to significant loss of CPM without much improvement of the resolution (23). Therefore, we have chosen the 50  $\mu\text{m}$  multimode optical fiber as the pinhole in our cuvette FCS setup. Furthermore, in Fig. 2 B, it may be seen that the CPM obtained with the 100  $\mu\text{m}$  fiber is  $\sim 20\%$  less than that obtained with the 50  $\mu\text{m}$  fiber. Hess and Webb have argued that CPM as a function of pinhole diameter should not exhibit any peak in the case of a perfectly 3D Gaussian PSF (26). Therefore, the small peak of the CPM observed at a pinhole size of 50  $\mu\text{m}$  in Fig. 2 B indicates deviations from a perfectly Gaussian PSF.

We then examine whether and how the quality and the alignment of the cuvette affect the performance of the cuvette FCS. Fig. 2 C shows the comparison of the CPM,  $\langle N \rangle$ , and  $\tau_D$  obtained using quartz cuvettes procured from three different manufacturers, referred to here as Hellma, MF1, and MF2. The dimensions of all the three cuvettes are the same, e.g., the thickness of the optical window = 1.25 mm and the pathlength = 10 mm. It may be seen that the CPM,  $\langle N \rangle$ , and  $\tau_D$  obtained using different cuvettes differ by 2.0-, 1.4-, and 1.2-fold, respectively. Therefore, the quality of the optical windows of the cuvettes is extremely important for the S/N of the FCS data. In fact, the CPM obtained using the MF1 and MF2 cuvettes is also

dependent on the particular side of the cuvette facing the path of the excitation (data not shown). We then test how the angular alignment of the cuvette influences cuvette FCS. Fig. 2 D shows how the CPM,  $\langle N \rangle$ , and  $\tau_D$  depend on the angle between the face of the objective and the optical window of the cuvette. It may be seen that CPM decreases by  $\sim 4$ -fold,  $\langle N \rangle$  increases by  $\sim 4$ -fold, and  $\tau_D$  increases by  $\sim 2$ -fold for an angular misalignment of  $0.40^\circ$ . Hence, the best sensitivity and resolution in the cuvette FCS is achieved when the cuvette surface is parallel to the face of the objective. The reasons behind the striking effects of quality and angular alignment of the cuvette are not clear, but we think that it may arise because of the following reasons discussed below. Enderlein et al. have shown that FCS measurements can be affected in the presence of even small deviations ( $\sim 5 \mu\text{m}$ ) in the thickness of the cover glasses (37). Hence, uniformity of the thickness of optical windows of the cuvettes can play crucial roles in the performance of cuvette FCS. Dross et al. have found that the FCS observation volume may be distorted if the focus is moved in the lateral direction from the optical axis of the objective (38). Therefore, tilt of the cuvette can cause similar optical aberrations. This problem can be severe, particularly in the case of cuvette FCS, because of the relatively high thickness of the optical windows of cuvettes. Furthermore, we have examined the birefringence of the cuvettes by CD (Fig. S4). Clearly, the cuvettes from MF1 and MF2 show nonzero CD, suggesting significant birefringence of the walls of these cuvettes. Hence, birefringence of the walls of the cuvette may, at least partly, affect the resolution of the confocal PSF. We note here that another contributing factor to the angular dependence may arise if the ELWD objectives are not optimally corrected for the flatness of the field of view. Because the best performance is achieved using Hellma cuvette, all the FCS measurements reported in the rest of the article are performed using this cuvette.

### Calibration of the observation volume and the S/N of $G(\tau)$

We then calibrate the cuvette FCS setup by performing measurements in aqueous solution of rhodamine B at  $25^\circ\text{C}$  to estimate the CPM, S/N,  $V_{\text{eff}}$ ,  $\sigma_r$ ,  $\sigma_z$ , and  $\omega$ . Fig. 3 A shows that the CPM of rhodamine B increases monotonically with the incident laser power. The increase of CPM deviates from linearity above 50  $\mu\text{W}$  of incident power, but it does not reach complete saturation even at the highest intensity (114  $\mu\text{W}$ ) used here. It may be seen that the maximal CPM obtained here using rhodamine B is 44 kHz. We note here that this is the total CPM; hence, the CPM recorded in each detection channel is  $\sim 22$  kHz. The average  $\tau_D$  obtained from the analysis of the  $G(\tau)$  data is  $64 \pm 2 \mu\text{s}$  (Fig. S5, A and B). Fig. 3 B shows the plots of the S/N ( $= \langle G(\tau) \rangle / \text{SD}$ ) as a function of  $\tau/\tau_D$ . Expectedly, S/N increases with an increase of CPM due

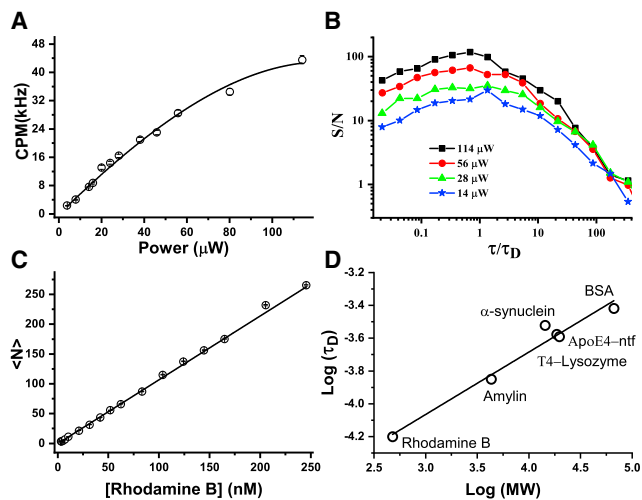

FIGURE 3 Calibration of the sensitivity and the observation volume of the cuvette FCS. (A) CPM (kHz) is shown as a function of incident laser power obtained using aqueous solution of rhodamine B. Symbols represent data, and the solid line is the fit using a parabola. The CPM deviates from linearity for incident power  $>50 \mu\text{W}$ . (B) The S/N of the  $G(\tau)$  data is measured at 114, 56, 28, and  $14 \mu\text{W}$  excitation power. Expectedly, the S/N increases with the CPM. (C) The average number of molecules ( $\langle N \rangle$ ) in the effective observation volume ( $V_{\text{eff}}$ ) is shown as a function of concentration of rhodamine B. Symbols represent data. The slope of the fitted line is 1.1 molecules/nM, indicating  $V_{\text{eff}} = 1.8 \text{ fL}$ . (D) The log-log plot of  $\tau_D$  versus molecular weight (MW) of free dye and several TMR-labeled-proteins is shown. Symbols represent data, and the solid line is linear fit. The slope obtained is  $0.36 \pm 0.01$ . The expected slope for globular proteins is 0.33 (39). To see this figure in color, go online.

to increase of excitation intensity (20,21,25). Fig. S5 D shows that the S/N at  $\tau = \tau_D$  increases linearly with CPM, as expected from Eq. 5. The highest S/N obtained in cuvette FCS is  $\sim 110$  at the highest CPM of 22 kHz per detection channel. Fig. 3 C shows the plot of  $\langle N \rangle$  as a function of concentration ( $C$ ) of rhodamine B. Expectedly,  $\langle N \rangle$  varies linearly with  $C$  over the entire range of concentration. Linear fit of the data yields slope = 1.1 molecule/nM. Hence, the estimated value of  $V_{\text{eff}}$  in cuvette FCS is  $1.8 \pm 0.1 \text{ fL}$  (see Eq. 4 a). Fig. S6, A and B show that mean  $\tau_D$  of rhodamine B obtained from the analysis of the  $G(\tau)$  data is  $63 \pm 2 \mu\text{s}$ . Using the known diffusion co-

efficient ( $D = 4.5 \times 10^{-6} \text{ cm}^2/\text{s}$ ) of rhodamine B in water, the  $\sigma_r$  is found to be  $\sim 337 \text{ nm}$  (Eq. 4 c). Using Eq. 4 b,  $\sigma_z$  and structure parameter ( $\omega$ ) are estimated to be  $2.85 \mu\text{m}$  and 8.5, respectively. Figs. S5 C and S6 C show that the value of  $\omega$  obtained from the fitting of the  $G(\tau)$  using Eq. 3 is  $\sim 10 \pm 1$ . Therefore, the values of  $\omega$  obtained using the two independent approaches agree quite well. This indicates that 3D Gaussian approximation of the PSF of the observation volume in cuvette FCS holds quite well.

We then examine if cuvette FCS is suitable for measurements using proteins of different sizes. We performed FCS measurements on amylin,  $\alpha$ -synuclein, T4-lysozyme, an N-terminal fragment of apolipoprotein E4 (Nt-apoE4), and BSA fluorescently labeled with TMR. The  $G(\tau)$  data along with the fits are shown in Fig. S7. All the proteins are fluorescently labeled with TMR. Fig. 3 D shows that  $\log(\tau_D)$  varies linearly with  $\log(\text{molecular weight})$ . The slope of the line is equal to  $0.36 \pm 0.01$ . The expected scaling exponent is  $0.33$  for globular proteins (12,39). Hence, the measured  $\tau_D$  values are consistent with the scaling law for globular proteins. The  $\tau_D$  of  $\alpha$ -synuclein is found to be somewhat higher, which is consistent with the extended conformation of  $\alpha$ -synuclein in native conditions (40).

### Comparison of cuvette FCS with a commercial microscope-based FCS

We then compare the sensitivity of the cuvette FCS measurements with that of a microscope-based commercial FCS setup. The commercial setup used here is a PicoQuant FCS module attached to an Olympus confocal microscope. The objective used in the commercial FCS is a water objective with  $\text{NA} = 1.2$ . Fig. 4, A and B show the autocorrelation data with the fits (and the residuals) obtained from 20 nM rhodamine B in PBS at  $25^\circ\text{C}$  using cuvette FCS and the PicoQuant FCS, respectively. The power of the excitation laser used is  $28 \mu\text{W}$  in both of the setups. It may be seen that the  $G(0)$  obtained in cuvette FCS is  $\sim 1/4$  of that obtained using the PicoQuant FCS, indicating a four-times-larger  $V_{\text{eff}}$  in the cuvette FCS. Fig. S8 shows that the S/N of the  $G(\tau)$  obtained using the two setups are similar.

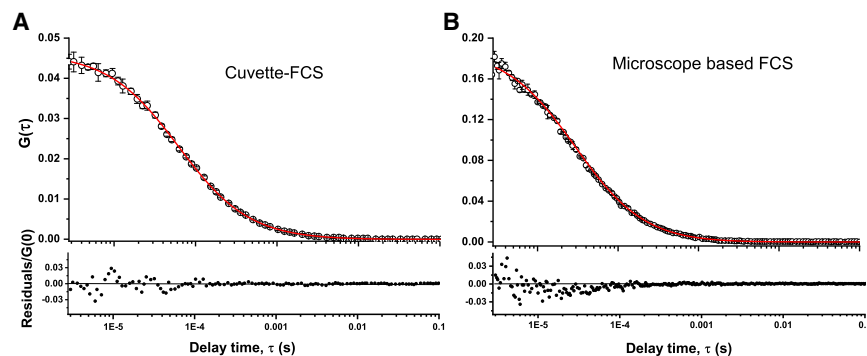

FIGURE 4 Comparison of cuvette FCS (A) and a commercial microscope-based FCS (B). Upper panels show the  $G(\tau)$  data with the fits. Lower panels show the residuals normalized by  $G(0)$ . The objective in microscope-based FCS is water immersion with  $\text{NA} = 1.2$  (B). The same concentration (20 nM) of rhodamine B and the same incident laser power ( $28 \mu\text{W}$ ) has been used in both of the setups.  $G(0)$  is four-times smaller in cuvette FCS (A) than in the microscope-based FCS (B). However, residuals normalized by  $G(0)$  are quite similar between the two setups. Comparison of  $\langle N \rangle$ ,  $\tau_D$ , and CPM is presented in Table 1, and the S/N are shown in Fig. S8. To see this figure in color, go online.

Comparison of the CPM, S/N,  $V_{eff}$ ,  $\sigma_r$ ,  $\sigma_z$ , and  $\omega$  obtained using these two setups is summarized in Table 1. It may be seen that the  $\sigma_r$ ,  $\sigma_z$ , and  $V_{eff}$  values achieved in cuvette FCS are, respectively, 1.4-, 2.5-, and 3.9-times-larger than those obtained using the conventional FCS setup. Because the NA of the objective used in cuvette FCS is 1.7-times-smaller than that used in the commercial FCS, the expected increases of  $\sigma_r$ ,  $\sigma_z$ , and  $V_{eff}$  in cuvette FCS are 1.7-, 2.5-, and 7.2-times, respectively (23). Furthermore, the CPM and the S/N in cuvette FCS are quite similar to those of the commercial FCS. Taken together, the data presented above indicate that the cuvette FCS performs significantly better than expected in comparison to the commercial FCS.

### Applications of cuvette FCS in temperature- and denaturant-dependent experiments

We then examine the suitability of the cuvette FCS setup for measurements in conditions that are generally avoided in microscope-based FCS. In confocal microscopes, the range of experimental temperature is generally restricted to 25–37°C because of incompatibility of the objectives at higher or lower temperatures. Because we are using an air objective, the temperature of the sample does not affect the objective. Here, we perform FCS measurements on rhodamine B in PBS buffer over a range of temperatures, starting from 15 to 60°C. Fig. 5 A shows how  $\langle N \rangle$  and CPM change with temperature. It may be seen that  $\langle N \rangle$  remains almost constant, indicating the robustness of  $V_{eff}$  over the entire range of temperature used here. This is also evident from the  $G(\tau)$  data presented in Fig. S9, which shows that  $G(0)$  is nearly the same at all the temperatures. The CPM is found to decrease by  $\sim 3$ -fold between 15 and 60°C. The solid line in the same figure indicates that the loss of CPM is consistent with the loss of fluorescence QY of rhodamine B with the increase of temperature measured in a spectrofluorometer. Because the viscosity of water changes with temperature, we have plotted the  $\tau_D$  as a function of the viscosity of the solution. Fig. 5 B shows that  $\tau_D$  of rhodamine B increases linearly with the viscosity of water, as may be expected from the Stokes-Einstein (SE) relationship (41). Taken together, measurements of  $\langle N \rangle$ , CPM, and  $\tau_D$  suggest that cuvette FCS is suitable for measurements over a wide range of temperatures. Although here we have used a limited range of temperatures, with an appropriately designed cuvette holder, even larger ranges of temperatures

can be used for measurements using cuvette FCS. For example, using a specially designed cell and an ELWD objective lens, Połatyńska et al. have shown that FCS measurements can be performed in a much larger range of temperatures (from 15 to 200°C) (42). However, in their setup, they have used a microscope-based setup and a thin glass coverslip as the optical window instead of the thick cuvette used here.

We then examine if the cuvette FCS can be used for measurements in urea. Here, we have coupled an automatic titrator with the cuvette for addition of urea into the buffer. Additionally, a magnetic stirrer is used for intermittent mixing of the solution (see Materials and Methods for the details). Therefore, the entire experiment is performed in an automatic manner. The temperature is maintained at 25°C. Fig. 6 A shows the plots of  $\langle N \rangle$  and CPM as a function of the concentration of urea. In this plot, both  $\langle N \rangle$  and  $\langle \text{CPM} \rangle$  are normalized by its values measured in 0 M urea. It may be seen that  $\langle N \rangle$  increases by  $\sim 15\%$  between 0 and 7 M urea. The increase of  $\langle N \rangle$  may indicate an increase of  $V_{eff}$  due to gradual worsening of the  $\sigma_z$  at higher concentrations of urea. Because the RI of the urea solution increases by  $\sim 5\%$ , the confocal PSF may be expected to be elongated by the same extent (19,43). Hence, the expected increase of  $V_{eff}$  is  $\sim 5\%$ . However, Fig. S10 B shows that the structure parameter of the FCS observation volume remains almost constant between 0 and 7 M urea, indicating no major or systematic increase of optical aberrations in urea. Because the error bars on the determination of the structure parameter are large, a change of 5% may not be noticeable. Another possible cause of increase of  $\langle N \rangle$  could be due to adsorption of the fluorophore on the cuvette walls at higher concentrations, followed by desorption of the fluorophore during dilutions (34). We used BSA in the solution to minimize adsorption, but it may not be possible to eliminate adsorption fully. The same figure shows that CPM increases by  $\sim 25\%$  between 0 and 7 M urea. This is counterintuitive because optical aberrations at higher concentrations of urea would decrease the CPM (17,19). To examine if the QY increases in urea, we measured the fluorescence of rhodamine B in varying concentrations of urea in a spectrofluorometer. The solid line in Fig. 6 A shows that ensemble fluorescence of rhodamine B increases by  $\sim 30\%$  between 0 and 7 M urea, indicating an increase of its QY in urea. Furthermore, a urea-dependent increase of QY is in good agreement with the increase of CPM measured by cuvette FCS, although there are small

**TABLE 1 Comparison of Cuvette FCS and a Commercial Conventional FCS**

|                | Obtained from Fitting $G(\tau)$ <sup>a</sup> Using Eq. 3 |                     |                     |           |                  | Calculated Using Eq. 4, a–c |                 |                       |                     |
|----------------|----------------------------------------------------------|---------------------|---------------------|-----------|------------------|-----------------------------|-----------------|-----------------------|---------------------|
|                | $\langle N \rangle$                                      | $\tau_D$ ( $\mu$ s) | $\sigma_z/\sigma_r$ | CPM (kHz) | S/N <sup>b</sup> | $V_{eff}$ (fL)              | $\sigma_r$ (nm) | $\sigma_z$ ( $\mu$ m) | $\sigma_z/\sigma_r$ |
| Cuvette FCS    | 21.7 $\pm$ 0.3                                           | 63 $\pm$ 2          | 10 $\pm$ 1          | 16.4      | 50               | 1.8 $\pm$ 0.1               | 337 $\pm$ 3     | 2.84 $\pm$ 0.2        | 8.4 $\pm$ 0.1       |
| Commercial FCS | 5.3 $\pm$ 0.2                                            | 33 $\pm$ 1          | 6 $\pm$ 0.5         | 17.7      | 51               | 0.43 $\pm$ 0.04             | 245 $\pm$ 4     | 1.29 $\pm$ 0.1        | 5.3 $\pm$ 0.1       |

<sup>a</sup>FCS measurements have been performed on a 20 nM rhodamine B solution in PBS at RT using 28  $\mu$ W excitation laser power.

<sup>b</sup>S/N calculated at  $\tau/\tau_D = 1$  using five identical measurements of  $G(\tau)$  acquired for 30 s each.



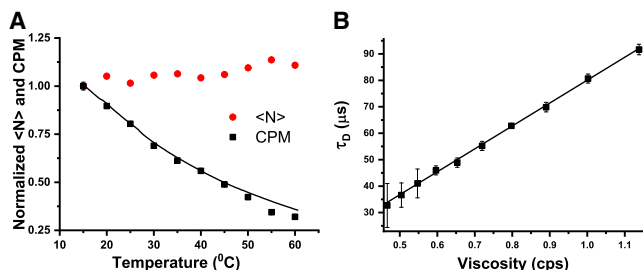

FIGURE 5 Performance of cuvette FCS over an extended range of temperatures. (A) Normalized  $\langle N \rangle$  (circles) and CPM (squares) are shown as a function of temperature. The solid line represents temperature-dependent normalized quantum yield of rhodamine B, measured using a spectrofluorometer. (B)  $\tau_D$  versus viscosity is shown. Here, the viscosity of the solution changes because of changes in temperature. The linear increase of  $\tau_D$  with viscosity is consistent with the SE relationship. To see this figure in color, go online.

differences at higher urea concentrations. Finally, we examine how the  $\tau_D$  of rhodamine B varies with urea. Because viscosity of the solution changes with the concentration of urea, here we have plotted the  $\tau_D$  as a function of viscosity. Fig. 6 B shows that the  $\tau_D$  of rhodamine B increases linearly with an increase of viscosity of the urea solution, as expected from the SE relationship as shown earlier by Sherman et al. (11). The  $G(\tau)$  data with the fits at various concentrations of urea are shown in Fig. S10 A. We note here that although some authors have used repeated adjustments of correction collar of the objective to minimize aberrations due to mismatch of the RIs, we find that this step can be eliminated if the observation volume is kept fixed within a depth of  $\sim 15 \mu\text{m}$  inside the cuvette (Fig. 2 A). Taken together, the data presented above indicate that cuvette FCS provides robust measurements of CPM and  $\tau_D$  in urea. Furthermore, measurements in urea using cuvette FCS are highly convenient compared to those using conventional FCS setups.

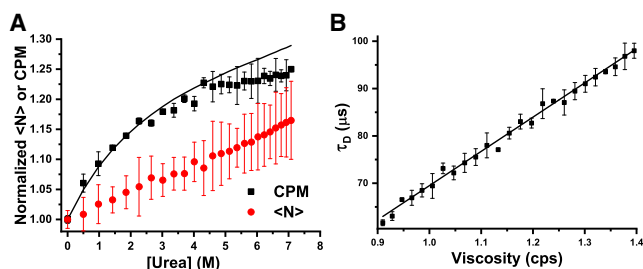

FIGURE 6 Cuvette FCS measurements in urea. (A) Normalized plots of CPM (squares) and  $\langle N \rangle$  (circles) are obtained from FCS measurements, and quantum yield (solid line) is obtained from spectrofluorometer measurements on 100 nM rhodamine B in 0–7 M urea. The increase of CPM (squares) is consistent with the urea-dependent increase of quantum yield of rhodamine B fluorescence (solid line). The small ( $\sim 15\%$ ) increase of  $\langle N \rangle$  may arise because of desorption of the fluorophore from the cuvette windows due to serial dilution of the sample. (B) Plot of  $\tau_D$  versus viscosity of urea is shown. Linear increase of  $\tau_D$  with viscosity is consistent with the SE relationship. Titration and mixing of urea have been performed using an autotitrator and a magnetic stirrer, respectively. To see this figure in color, go online.

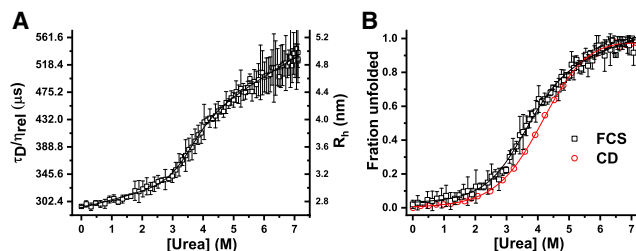

FIGURE 7 Unfolding of TMR-Nt-apoE4 monitored by cuvette FCS. (A) The squares represent experimental data ( $\tau_D$  or  $R_h$ ) measured by FCS. The  $R_h$  values of the folded and the unfolded states are 2.8 and 4.8 nm, respectively. (B) Fraction of unfolded Nt-apoE4 is measured by FCS (squares) and by CD (circles). The solid lines are fits using a two-state model (36). The values of  $\Delta G$ ,  $m$ , and denaturation midpoints are summarized in Table S1. Titration and mixing of urea have been performed using an autotitrator and a magnetic stirrer, respectively. To see this figure in color, go online.

### Study of urea-dependent unfolding of Nt-apoE4 by cuvette FCS

Finally, we examine if cuvette FCS can be successfully employed to study the unfolding of proteins induced by urea. Here, we have performed the unfolding of TMR-labeled Nt-apoE4 at 25°C. The Nt-apoE4 is a four-helix bundle (Protein Data Bank (PDB): 1gs9). The hydrodynamic radius ( $R_h$ ) of Nt-apoE4 calculated using hydropro10 is 2.67 nm (44). Fig. 7 A shows that  $R_h$  of Nt-apoE4 in the native buffer is equal to  $2.7 \pm 0.1$  nm, indicating good agreement with the calculated  $R_h$ . Furthermore, the viscosity normalized diffusion time ( $\tau_D/\eta_{rel}$ ) of Nt-apoE4 increases monotonically from  $\sim 300$  to  $520 \mu\text{s}$ , corresponding to an increase of  $R_h$  from  $\sim 2.7$  to 4.8 nm between 0 and 7 M urea. Additionally, the increase of  $\tau_D/\eta_{rel}$  (or  $R_h$ ) shows a sigmoidal transition consistent with the cooperative unfolding of the Nt-apoE4 in urea. To plot the fraction of unfolded proteins as a function of concentration of urea, we then analyze the  $G(\tau)$  using a two-component diffusion model (Eq. 7 a). Because the two-component model introduces two additional fitting parameters, this leads to redundancy in the determination of both  $\langle N \rangle$  and  $\tau_D$ . Hence, we fix the values of the  $\tau_D/\eta_{rel}$  of both the folded and the unfolded proteins using the values obtained from Fig. 7 A to fit  $G(\tau)$  with Eq. 7 a (see Materials and Methods for details). We note here that the unfolded states of several proteins have been shown to undergo gradual expansion with increasing concentrations of the chemical denaturants (12,45). Therefore, fixing the value of  $\tau_D/\eta_{rel}$  of the unfolded state ignores such effects. Fig. 7 B shows that the fractions of unfolded Nt-apoE4 as a function of urea measured by cuvette FCS and CD agree well with each other. The stability parameters obtained from the analysis of the fraction unfolded data using a two-state model (36) are summarized in Table S1. The values of  $\Delta G$  obtained from the FCS and CD data are  $3.3 \pm 0.4$  and  $3.3 \pm 0.2$  kcal/mol, respectively. Thus,  $\Delta G$  measured by cuvette FCS and CD agree with each other, and this is also consistent with the published results (46).

However, the midpoint of denaturation obtained from the FCS data is somewhat smaller than that obtained from the CD data. Consequently, the “m” values obtained using the two different techniques are also different. This may indicate mechanistic differences between the expansion of tertiary structure and the loss of secondary structure of the protein (11,12,47).  $G(\tau)$  data with the fits at different concentrations of urea are shown in Fig. S11.

## DISCUSSION

Here, we have demonstrated that FCS measurements can be performed inside regular cuvettes with high sensitivity. Sensitivity of the cuvette FCS is critically dependent on several factors, such as the focal depth and the quality and angular alignment of the cuvette. Therefore, these factors need to be taken into account while building the cuvette FCS setup and performing the measurements. A major advantage of the cuvette FCS setup is that the resolution and the sensitivity that can be achieved are comparable to the commercial microscope-based FCS. In Table 1, we have shown that the  $V_{eff}$  and the  $\sigma_r$  obtained in cuvette FCS are only moderately larger than that generally observed in a commercial microscope-based FCS that uses high NA objectives. To our surprise, we find that the CPM and the S/N obtained (using the same laser power) in the commercial FCS and our cuvette FCS are almost identical (Table 1). The highest CPM obtained from an aqueous solution of rhodamine B in the cuvette FCS is  $\sim 44$  kHz. This is comparable to the reported maximal CPM of 30–50 kHz obtained from Alexa488 in aqueous buffer using a commercial PicoQuant FCS (48). We note here that the CPM and S/N obtained using a high NA objective is expected to be much higher than that obtained using a low NA objective due to higher collection efficiency and excitation power density. For example, Połatyńska et al. used a microscope-based FCS setup and reported that the CPM obtained using a 0.6 NA ELWD air objective in the same setup is  $\sim 35$ -times smaller compared to that obtained using a 1.2 NA water immersion objective. This led to the poor S/N in  $G(\tau)$  in the case of the low NA objective (42). Comparable values of the S/N obtained using our cuvette FCS and a commercial FCS indicate that the commercial FCS setup is not optimized to the maximal achievable sensitivity. One reason behind this less-than-optimal sensitivity of the PicoQuant FCS could be due to the use of hybrid photomultiplier tube detectors instead of the avalanche photodiodes. The other possibilities include use of solid-state lasers, which generally exhibit imperfections in the wave front. Additionally, commercial FCS setups generally use more optical elements than the home-built ones. Extra optical elements in the fluorescence detection path can cause significant loss of CPM.

Cuvette FCS offers several advantages over microscope-based FCS instruments. Two major advantages have been demonstrated here. For example, cuvette FCS allows mea-

surements over a large range of temperatures. Our data presented in Fig. 5 suggest that cuvette FCS measurements are highly robust over a range of temperatures from 15 to 60°C. Furthermore, cuvette FCS can be integrated with automatic titrators and magnetic stirrers for fully automated titration experiments. Use of automatic titrators and temperature-controlled cell holders are particularly advantageous in acquiring a large number of highly accurate data points, as may be seen in Figs. 6 and 7. Furthermore, cuvette FCS can be used for studies of unfolding of proteins induced by chemical denaturants such as urea. Although FCS yields single-molecule-level information, denaturant-induced unfolding of biomolecules is seldom performed in FCS. There are major difficulties in measurements of diffusion time or molecular size in urea in conventional FCS setups. The difficulties arise due to mismatch of RI between the solution and the immersion media, leading to optical aberrations (10,49). In microscope-based FCS measurements, samples containing different concentrations of urea are measured individually. To minimize the aberrations, some authors adjust the correction collar of the objective at each concentration of the denaturant (10). Alternatively, the correction collar is kept fixed, but the distance between the objective and the coverslip is adjusted carefully for each sample to keep the depth of the focal point very close to the coverslip (11). In cuvette FCS, the correction collar is fixed according to the thickness of the wall of the cuvette. The distance between the objective and the cuvette is fixed such that the observation volume is at  $\sim 15$   $\mu\text{m}$  from the inner surface of the cuvette wall. Because we are using a low NA objective, the optical aberrations are minimal within a focal depth of 0–25  $\mu\text{m}$  (Fig. 2 A) (17). Therefore, low NA objectives may be preferable when aberrations due to mismatch of the RIs need to be avoided. In our setup, the concentration of urea can be changed by manual pipetting or by using autotitrators. Therefore, titration experiments in the cuvette FCS can be fully automated. Such automation has not been demonstrated in microscope-based FCS.

Single-molecule studies of denaturant-dependent folding and unfolding of proteins is an important area of research in biophysics. For example, Sherman and Haran have used single-molecule Förster resonance energy transfer and FCS to measure GdnCl-induced expansion of protein L to determine the coil-globule transition point and calculated the per-residue average solvation energy (41). Furthermore, Schuler and co-workers have demonstrated that single-molecule studies of protein unfolding can be used to estimate net interaction energy of the unfolded form of a protein in a solvent (12). However, there are only a few studies of protein unfolding using FCS reported in the literature, most likely due to the inherent difficulties in performing these experiments (10,11,41). Here, we have demonstrated that cuvette FCS can be used conveniently to study urea-dependent unfolding of proteins using Nt-apoE4 (Fig. 7). We find that the free energy of folding of Nt-apoE4

measured by FCS is the same as that obtained from CD experiments. However, an increase of hydrodynamic size due to unfolding is found to be less cooperative than the loss of secondary structure. This may indicate that the expansion of the tertiary structure precedes the disruption of the secondary structure. Similar observations were reported in case of protein L by Sherman et al. (11).

We speculate that cuvette FCS can be useful in addressing several other problems. For example, FCS has been used to monitor formation of oligomers and protofibrils in the early stages of protein aggregation (50). However, nucleation-dependent aggregation kinetics is generally slow, occurring over several hours, days, or weeks. Therefore, in vitro, these processes are accelerated by agitations such as stirring and/or by raising the temperature of incubation (51). Cuvette FCS would be suitable to monitor such processes. Cuvette FCS can also be used for measurements in nonaqueous solvents, including corrosive solvents such as those experiments involving solvent-dependent dynamics of colloids, polymers, or biopolymers such as intrinsically disordered proteins. Furthermore, cuvette FCS can offer significant advantages in measurements at very low concentrations of biomolecules because of the low surface-to-volume ratio of cuvettes and because of the compatibility of its surfaces to passivation by covalent linkage of polyethylene glycol to minimize adsorption (52). We propose that cuvette FCS may be adapted to perform experiments such as scanning FCS on samples held inside regular glass or quartz test tubes. Scanning FCS has been used to detect fluorescently dim but large objects such as bacteria (15). We think that the high sensitivity of the cuvette FCS would enable detection and characterization of much smaller hazardous pathogens such as viruses. Cuvette FCS is potentially compatible with the rapid mixing flow cells commonly used in stopped-flow kinetic experiments. However, the time resolution in FCS experiments is limited by the acquisition time of the autocorrelation data. Because the acquisition time in FCS is typically  $>1$  s, the cuvette FCS coupled to a stopped-flow setup can be used to monitor the kinetics of the processes with a characteristic timescale of  $\sim 1$  s. Furthermore, with an appropriately designed cell holder, cuvette FCS can also be adapted for measurements at high pressures (53).

We would like to note here that the limited range of the commercially available ELWD objectives limits the design of the cuvette FCS at present. Currently, the commercially available ELWD objectives with correction collars for cover glass thicknesses are dry objectives. Because most of the experiments involving biomolecules are performed in aqueous buffers, a water immersion objective would be preferred. If such objectives become available commercially in the near future, this can circumvent the optical aberrations suffered by the dry objectives and improve the performance of the cuvette FCS further.

Finally, we propose that our setup can be integrated with spectrofluorometers. Spectrofluorometers are highly popu-

lar for applications in a wide range of experiments in biochemistry and biophysics laboratories. However, these measurements provide only ensemble-level information. Therefore, cuvette FCS can be extremely useful in performing single-molecule measurements in most of the experiments that are performed regularly in spectrofluorometers but not performed in microscope-based FCS instruments.

## SUPPORTING MATERIAL

Supporting Materials and Methods, eleven figures, and one table are available at [http://www.biophysj.org/biophysj/supplemental/S0006-3495\(18\)30717-3](http://www.biophysj.org/biophysj/supplemental/S0006-3495(18)30717-3).

## AUTHOR CONTRIBUTIONS

K.G. conceptualized the experiments. B.S., T.B.S., B.K., and K.G. designed and performed the research. B.S. and K.G. analyzed the data and wrote the article.

## ACKNOWLEDGMENTS

We acknowledge the anonymous reviewers for their valuable suggestions, which have improved the article significantly.

K.G. received funding from the Department of Science and Technology, India.

## REFERENCES

1. Elson, E. L. 2011. Fluorescence correlation spectroscopy: past, present, future. *Biophys. J.* 101:2855–2870.
2. Ehrenberg, M., and R. Rigler. 1976. Fluorescence correlation spectroscopy applied to rotational diffusion of macromolecules. *Q. Rev. Biophys.* 9:69–81.
3. Hwang, L. C., and T. Wohland. 2004. Dual-color fluorescence cross-correlation spectroscopy using single laser wavelength excitation. *ChemPhysChem.* 5:549–551.
4. Bonnet, G., O. Krichevsky, and A. Libchaber. 1998. Kinetics of conformational fluctuations in DNA hairpin-loops. *Proc. Natl. Acad. Sci. USA.* 95:8602–8606.
5. Hebert, B., S. Costantino, and P. W. Wiseman. 2005. Spatiotemporal image correlation spectroscopy (STICS) theory, verification, and application to protein velocity mapping in living CHO cells. *Biophys. J.* 88:3601–3614.
6. Cardarelli, F., and E. Gratton. 2010. In vivo imaging of single-molecule translocation through nuclear pore complexes by pair correlation functions. *PLoS One.* 5:e10475.
7. LaRochelle, J. R., G. B. Cobb, ..., A. Schepartz. 2015. Fluorescence correlation spectroscopy reveals highly efficient cytosolic delivery of certain penta-arg proteins and stapled peptides. *J. Am. Chem. Soc.* 137:2536–2541.
8. Bacia, K., S. A. Kim, and P. Schuille. 2006. Fluorescence cross-correlation spectroscopy in living cells. *Nat. Methods.* 3:83–89.
9. Guldbbrand, S., V. Kirejev, ..., M. B. Ericson. 2013. Two-photon fluorescence correlation spectroscopy as a tool for measuring molecular diffusion within human skin. *Eur. J. Pharm. Biopharm.* 84:430–436.
10. Chattopadhyay, K., S. Saffarian, ..., C. Frieden. 2005. Measuring unfolding of proteins in the presence of denaturant using fluorescence correlation spectroscopy. *Biophys. J.* 88:1413–1422.

11. Sherman, E., A. Itkin, ..., G. Haran. 2008. Using fluorescence correlation spectroscopy to study conformational changes in denatured proteins. *Biophys. J.* 94:4819–4827.
12. Hofmann, H., A. Soranno, ..., B. Schuler. 2012. Polymer scaling laws of unfolded and intrinsically disordered proteins quantified with single-molecule spectroscopy. *Proc. Natl. Acad. Sci. USA.* 109:16155–16160.
13. Zettl, H., W. Häfner, ..., G. Krausch. 2004. Fluorescence correlation spectroscopy of single dye-labeled polymers in organic solvents. *Macromolecules.* 37:1917–1920.
14. Garai, K., R. Sureka, and S. Maiti. 2007. Detecting amyloid- $\beta$  aggregation with fiber-based fluorescence correlation spectroscopy. *Biophys. J.* 92:L55–L57.
15. Altamore, I., L. Lanzano, and E. Gratton. 2013. Dual channel detection of ultra low concentration of bacteria in real time by scanning FCS. *Meas. Sci. Technol.* 24:65702.
16. Banachowicz, E., A. Patkowski, ..., J. Gapiński. 2014. Successful FCS experiment in nonstandard conditions. *Langmuir.* 30:8945–8955.
17. Hell, S., G. Reiner, ..., E. H. K. Stelzer. 1993. Aberrations in confocal fluorescence microscopy induced by mismatches in refractive index. *J. Microsc.* 169:391–405.
18. Sheppard, C. J. R. 1989. Axial resolution of confocal fluorescence microscopy. *J. Microsc.* 154:237–241.
19. Sheppard, C. J. R., and P. Török. 1997. Effects of specimen refractive index on confocal imaging. *J. Microsc.* 185:366–374.
20. Koppel, D. E. 1974. Statistical accuracy in fluorescence correlation spectroscopy. *Phys. Rev. A.* 10:1938–1945.
21. Saffarian, S., and E. L. Elson. 2003. Statistical analysis of fluorescence correlation spectroscopy: the standard deviation and bias. *Biophys. J.* 84:2030–2042.
22. Rigler, R., Ü. Mets, and J. Widengren. 1993. Fluorescence correlation spectroscopy with high count rate and low background: analysis of translational diffusion. *Eur. Biophys. J.* 22:169–175.
23. Wilson, T. 2011. Resolution and optical sectioning in the confocal microscope. *J. Microsc.* 244:113–121.
24. Maiti, S., U. Haupts, and W. W. Webb. 1997. Fluorescence correlation spectroscopy: diagnostics for sparse molecules. *Proc. Natl. Acad. Sci. USA.* 94:11753–11757.
25. Ivanchenko, S., and D. C. Lamb. 2011. *Fluorescence Correlation Spectroscopy: Principles and Developments.* Springer, Dordrecht, The Netherlands, pp. 1–30.
26. Hess, S. T., and W. W. Webb. 2002. Focal volume optics and experimental artifacts in confocal fluorescence correlation spectroscopy. *Biophys. J.* 83:2300–2317.
27. Sheppard, C. J. R., and M. Gu. 1992. Axial imaging through an aberrating layer of water in confocal microscopy. *Opt. Commun.* 88:180–190.
28. Wohland, T., R. Rigler, and H. Vogel. 2001. The standard deviation in fluorescence correlation spectroscopy. *Biophys. J.* 80:2987–2999.
29. Volles, M. J., and P. T. Lansbury, Jr. 2007. Relationships between the sequence of  $\alpha$ -synuclein and its membrane affinity, fibrillization propensity, and yeast toxicity. *J. Mol. Biol.* 366:1510–1522.
30. Garai, K., S. M. Mustafi, ..., C. Frieden. 2010. Structural differences between apolipoprotein E3 and E4 as measured by (19)F NMR. *Protein Sci.* 19:66–74.
31. Korson, L., W. Drost-Hansen, and F. J. Millero. 1969. Viscosity of water at various temperatures. *J. Phys. Chem.* 73:34–39.
32. Kawahara, K., and C. Tanford. 1966. Viscosity and density of aqueous solutions of urea and guanidine hydrochloride. *J. Biol. Chem.* 241:3228–3232.
33. Gendron, P. O., F. Avaltroni, and K. J. Wilkinson. 2008. Diffusion coefficients of several rhodamine derivatives as determined by pulsed field gradient-nuclear magnetic resonance and fluorescence correlation spectroscopy. *J. Fluoresc.* 18:1093–1101.
34. Müller, J. D., Y. Chen, and E. Gratton. 2003. Fluorescence correlation spectroscopy. *Methods in Enzymology.* Academic Press, pp. 69–92.
35. Meseth, U., T. Wohland, ..., H. Vogel. 1999. Resolution of fluorescence correlation measurements. *Biophys. J.* 76:1619–1631.
36. Santoro, M. M., and D. W. Bolen. 1988. Unfolding free energy changes determined by the linear extrapolation method. 1. Unfolding of phenylmethanesulfonyl alpha-chymotrypsin using different denaturants. *Biochemistry.* 27:8063–8068.
37. Enderlein, J., I. Gregor, ..., J. Fitter. 2004. Art and artefacts of fluorescence correlation spectroscopy. *Curr. Pharm. Biotechnol.* 5:155–161.
38. Dross, N., C. Spriet, ..., J. Langowski. 2009. Mapping eGFP oligomer mobility in living cell nuclei. *PLoS One.* 4:e5041.
39. Crick, S. L., M. Jayaraman, ..., R. V. Pappu. 2006. Fluorescence correlation spectroscopy shows that monomeric polyglutamine molecules form collapsed structures in aqueous solutions. *Proc. Natl. Acad. Sci. USA.* 103:16764–16769.
40. Ferreon, A. C., Y. Gambin, ..., A. A. Deniz. 2009. Interplay of alpha-synuclein binding and conformational switching probed by single-molecule fluorescence. *Proc. Natl. Acad. Sci. USA.* 106:5645–5650.
41. Sherman, E., and G. Haran. 2006. Coil-globule transition in the denatured state of a small protein. *Proc. Natl. Acad. Sci. USA.* 103:11539–11543.
42. Połatyńska, A., K. Tomczyk, ..., A. Patkowski. 2017. Temperature dependent FCS studies using a long working distance objective: viscosities of supercooled liquids and particle size. *J. Chem. Phys.* 146:084506.
43. Besseling, T. H., J. Jose, and A. Van Blaaderen. 2015. Methods to calibrate and scale axial distances in confocal microscopy as a function of refractive index. *J. Microsc.* 257:142–150.
44. Ortega, A., D. Amorós, and J. García de la Torre. 2011. Prediction of hydrodynamic and other solution properties of rigid proteins from atomic- and residue-level models. *Biophys. J.* 101:892–898.
45. Skinner, J. P., Y. Chen, and J. D. Müller. 2005. Position-sensitive scanning fluorescence correlation spectroscopy. *Biophys. J.* 89:1288–1301.
46. Morrow, J. A., M. L. Segall, ..., K. H. Weisgraber. 2000. Differences in stability among the human apolipoprotein E isoforms determined by the amino-terminal domain. *Biochemistry.* 39:11657–11666.
47. Tischer, A., and M. Auton. 2013. Urea-temperature phase diagrams capture the thermodynamics of denatured state expansion that accompany protein unfolding. *Protein Sci.* 22:1147–1160.
48. Kempe, D., A. Schöne, ..., M. Gabba. 2015. Accurate fluorescence quantum yield determination by fluorescence correlation spectroscopy. *J. Phys. Chem. B.* 119:4668–4672.
49. Lehmann, S., S. Seiffert, and W. Richtering. 2015. Refractive index mismatch can misindicate anomalous diffusion in single-focus fluorescence correlation spectroscopy. *Macromol. Chem. Phys.* 216:156–163.
50. Garai, K., B. Sahoo, ..., S. Maiti. 2007. Zinc lowers amyloid- $\beta$  toxicity by selectively precipitating aggregation intermediates. *Biochemistry.* 46:10655–10663.
51. Garai, K., P. B. Verghese, ..., C. Frieden. 2014. The binding of apolipoprotein E to oligomers and fibrils of amyloid- $\beta$  alters the kinetics of amyloid aggregation. *Biochemistry.* 53:6323–6331.
52. Selvin, P. R., and T. Ha. 2008. *Single-Molecule Techniques: A Laboratory Manual.* Cold Spring Harbor Laboratory Press, Cold Spring Harbor, NY.
53. Müller, J. D., and E. Gratton. 2003. High-pressure fluorescence correlation spectroscopy. *Biophys. J.* 85:2711–2719.

**Biophysical Journal, Volume 115**

**Supplemental Information**

**A Fluorescence Correlation Spectrometer for Measurements in  
Cuvettes**

**Bankanidhi Sahoo, Timir Baran Sil, Biswajit Karmakar, and Kanchan Garai**

## Supplementary Information

### A fluorescence correlation spectrometer for measurements in cuvettes

B Sahoo,<sup>†</sup> TB Sil,<sup>†</sup> B Karmakar<sup>‡</sup> and K Garai<sup>†\*</sup>

#### List of Figures and Tables:

1. FIGURE S1: Design of the cuvette holder with heating and cooling arrangements
2. FIGURE S2: Measurement of angular displacement of the cuvette.
3. FIGURE S3: Effects of focal depth, pinhole size, quality and alignment of the cuvette on  $G(\tau)$ .
4. FIGURE S4: CD spectra of the cuvettes procured from three different manufacturers
5. FIGURE S5: Effects of excitation intensity on the autocorrelation ( $G(\tau)$ ) data in cuvette-FCS.
6. FIGURE S6: FCS measurements over a range of concentration of the rhodamine B
7. FIGURE S7:  $G(\tau)$  obtained from proteins of different molecular weights.
8. FIGURE S8: Comparison of S/N between a commercial microscope-based and cuvette- FCS
9. FIGURE S9:  $G(\tau)$  data obtained from 50 nM rhodamine B in PBS at different temperatures.
10. FIGURE S10:  $G(\tau)$  data from rhodamine B in different concentrations of urea in PBS.
11. FIGURE S11: Normalized  $G(\tau)$  data obtained from unfolding of TMR labeled Nt-ApoE4 in different concentrations of urea in PBS.
12. Table S1: Summary of the stability parameters for unfolding of Nt-apoE4 in urea.

### *Design of the temperature controlled Cuvette holder:*

The cuvette holder is manufactured in the machine shop of Tata Institute of Fundamental Research, Hyderabad. Design of the holder is shown in Fig. S1. Since the Cuvette-FCS setup is built using cage rods and cage plates obtained from Thorlabs, the cuvette holder is designed to ensure compatibility with the cage system. Since we have observed that the performance of cuvette-FCS is critically dependent on the alignment of the cuvette, two Thorlabs cage plates (the circular cage plate at the front is visible in Fig. S1) are attached at both sides of the cuvette holder to ensure best compatibility with the rest of the cage system. Two thin sheets of Teflon are inserted between the holder and the cage plates for thermal isolation of the cuvette holder from the rest of the setup. The holder is cooled by three peltier coolers (Part no. TEC1-12706) from three sides. A stainless-steel water jacket surrounds the entire holder for cooling the peltiers. A cartridge heater element (dia = 6 mm, height = 20 mm) is inserted inside the holder for heating. A temperature sensor is inserted into the holder very close to the cuvette to monitor temperature. The peltier is kept ON all the time. Therefore, the temperature of the holder is maintained at a set temperature by controlling the heating current. The heating current is controlled using a temperature controller (Selec, India). Temperature of the cuvette is found to be in good agreement with that of the holder within a range of 15<sup>0</sup> to 60<sup>0</sup> C (data not shown).

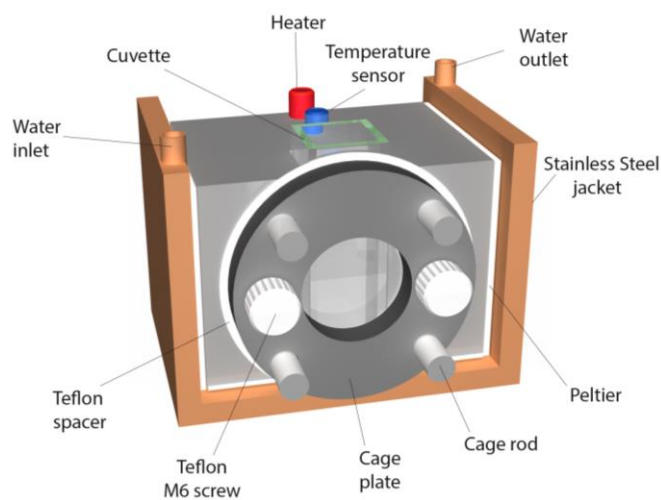

**FIGURE S1:** Design of the cuvette holder with heating and cooling arrangements.

### Measurement of angular misalignment of the cuvette:

While the cuvette holder is designed to ensure compatibility with the cage system of the FCS setup, a small amount of angular displacement of the cuvette holder is still possible due to the slightly larger internal diameter of the holes in the cuvette holder than the outer diameter of the cage rods. The angular position of the cuvette holder can be adjusted using two screws that are used also for mounting the cuvette holder to the cage plate in the cage system. Since the overall angular displacement is very small it is measured using deflection of a laser beam that is reflected from the optical window of the cuvette on a screen (Fig. S2). Fig. S2 shows that the change of angle,  $\theta = \frac{d}{2l}$  where  $d$  is the deflection of the reflected laser beam and  $l$  is the distance between the optical window of the cuvette and the screen. FCS measurements have been performed at different values of  $\theta$  between -0.4 to +0.4 degrees.

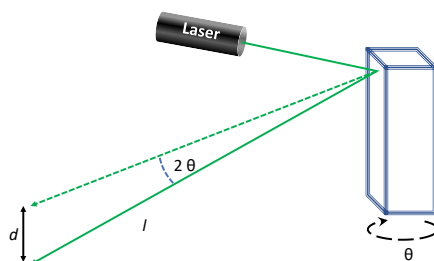

**FIGURE S2:** Measurement of angular displacement of the cuvette. A beam of light from a diode laser ( $\lambda=520$  nm) is reflected from the optical window of the cuvette. The reflected beam is projected on a screen placed at a distance “ $l$ ” from the cuvette. A small angular displacement of the cuvette gives rise to a measurable linear displacement “ $d$ ” of the laser spot on the screen. The angular displacement ( $\theta$ ) of the cuvette is measured as  $d/2l$ . In our setup,  $l = 70$  cm.



*Characterization of the parameters that critically affect the performance of cuvette-FCS:*

In Figure 2 of the article we have investigated how the performance of cuvette-FCS depend on the A) depth of the focal volume inside the sample, B) size of the pinhole diameter, C) quality of the cuvette and D) angular alignment of the cuvette.

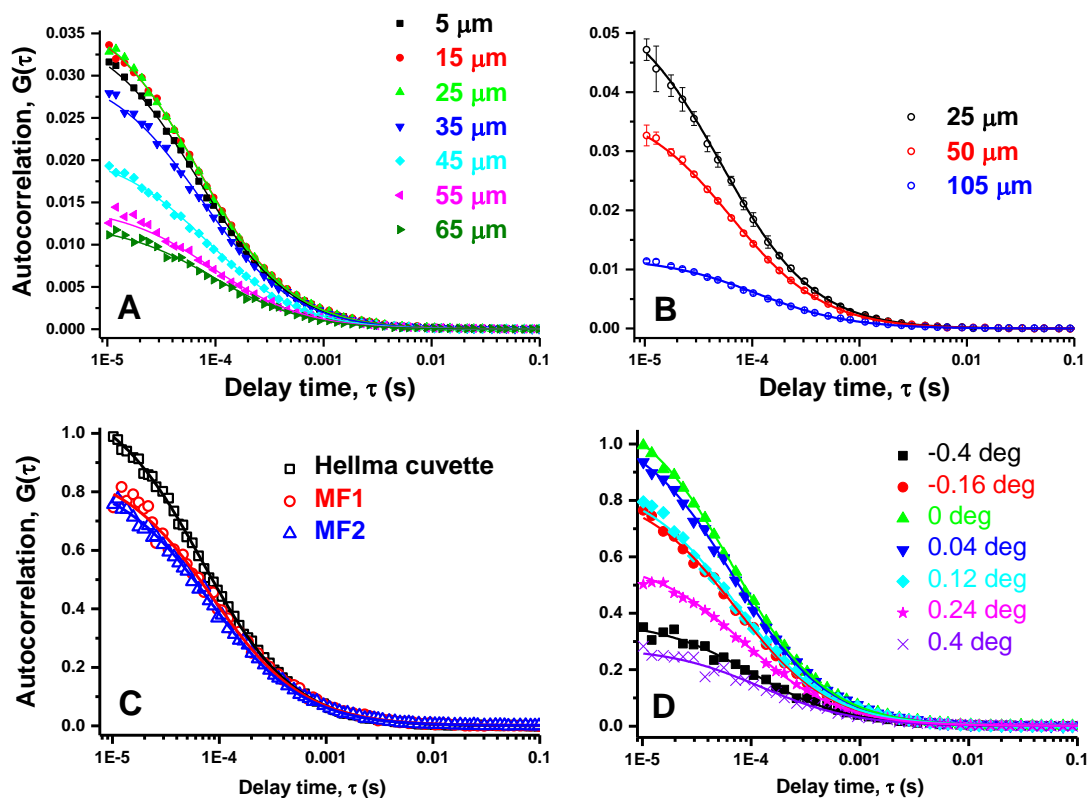

**FIGURE S3:** Effects of focal depth, pinhole size, quality and alignment of the cuvette on  $G(\tau)$ . FCS experiments have been performed using 30 nM rhodamine B in PBS buffer at RT. The symbols represent  $G(\tau)$  data and the solid lines are fits using equation 3. A)  $G(\tau)$  data acquired at different depths of the focal spot inside the cuvette. Clearly,  $G(\tau)$  acquired at the depths between 5 to 25  $\mu\text{m}$  are quite similar. The amplitudes of  $G(\tau)$  becomes progressively smaller at the larger depths. B) Effects of size of the pinholes on  $G(\tau)$ . We have used multimode optical fibers of diameters, 25, 50 and 105  $\mu\text{m}$  as pinholes in our setup. Expectedly,  $G(0)$  is higher with 25  $\mu\text{m}$  pinhole. C) Effects of quality of the cuvette on the  $G(\tau)$  curves obtained from the same sample. The  $G(\tau)$  curves are normalized by the  $G(0)$  obtained using the Hellma cuvette. Clearly, the highest  $G(0)$  is obtained using the Hellma cuvette. D) Effects of angular misalignment of the cuvette on  $G(\tau)$ . The  $G(\tau)$  data are normalized by the  $G(0)$  obtained at  $\theta = 0$  degree. Clearly,  $G(\tau)$  worsens dramatically even with misalignment by 0.4 degree. Some of the  $G(\tau)$  curves have been omitted in this figure for clarity of presentation.

*Birefringence of the cuvettes examined by circular dichroism (CD):*

The CD measurements are performed in a spectropolarimeter (Jasco). The baseline spectra is recorded with no cuvette, *i.e.*, in air. The CD spectra presented below are acquired with empty cuvettes. The spectra are corrected by the baseline.

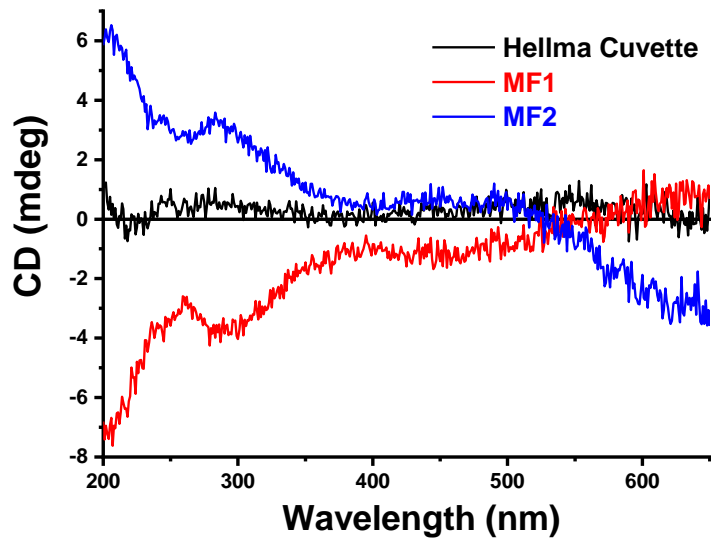

**FIGURE S4:** CD spectra of the cuvettes procured from three different manufacturers, viz, MF1, MF2 and Hellma. The CD of the Hellma cuvette (black line) is nearly zero over the entire range of the wavelength. Clearly, the cuvettes obtained from both MF1 (red line) and MF2 (blue line) show non-zero CD indicating birefringence of the walls of these cuvettes. The birefringence may introduce optical aberrations and distort the FCS observation volume.

Cuvette-FCS measurements at different excitation laser power:

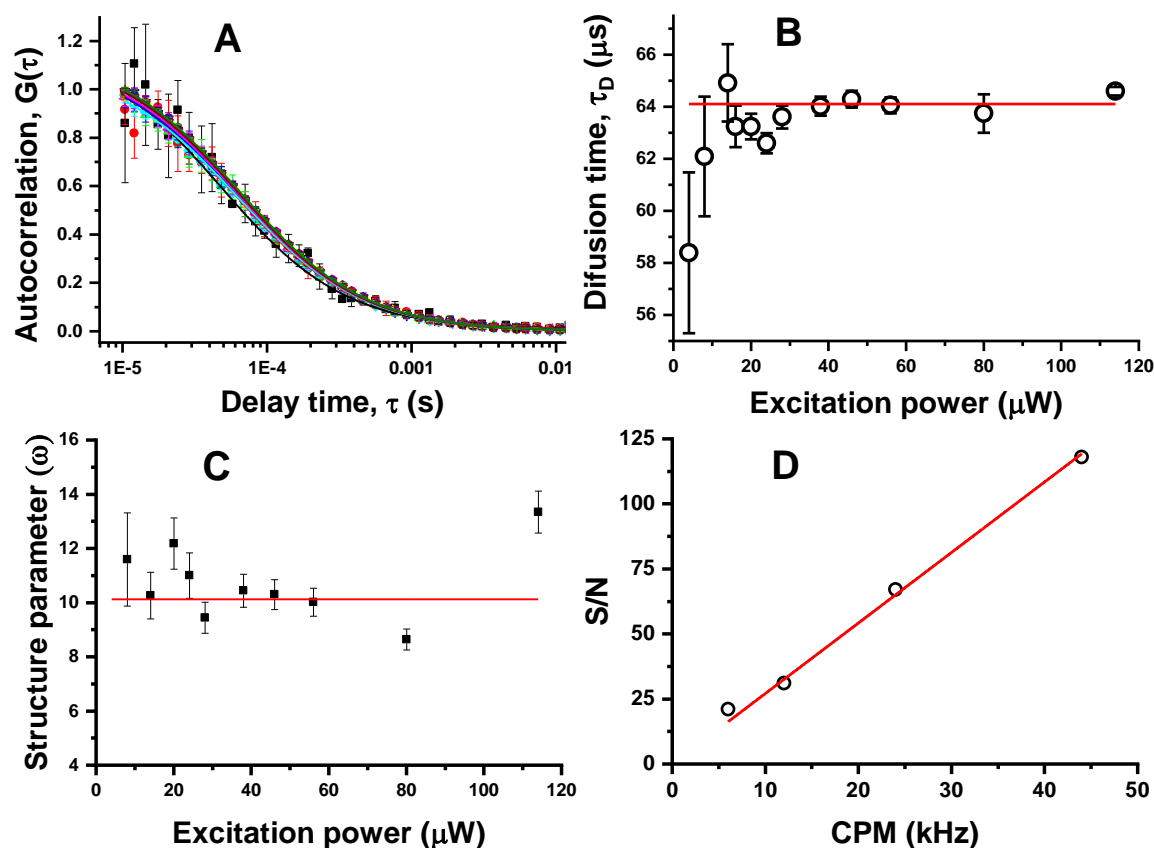

**FIGURE S5:** Effects of excitation intensity on the autocorrelation ( $G(\tau)$ ) data in cuvette-FCS. A) Normalized  $G(\tau)$  (symbols) obtained using excitation power ranging from 5-114  $\mu\text{W}$  from a solution of rhodamine B in PBS at pH 7.4 at RT. Solid lines at fits using single component diffusion model (see eq. 3). B) Diffusion time,  $\tau_D$  as a function of excitation power. The solid line corresponds to the weighted mean of  $\tau_D = 64 \mu\text{s}$ . Large error bars on  $\tau_D$  at low excitation power arise likely due to poor CPM at very low power. C) Structure parameter ( $\omega = \sigma_z/\sigma_r$ ) obtained from fitting of  $G(\tau)$ . The solid line corresponds to the weighted mean of  $\omega$ . D) S/N (calculated at  $\tau/\tau_D = 1$ ) as a function of CPM. Expectedly, S/N increases linearly with CPM (see Eq. 5).

*Cuvette-FCS measurements using different concentrations of rhodamine B:*

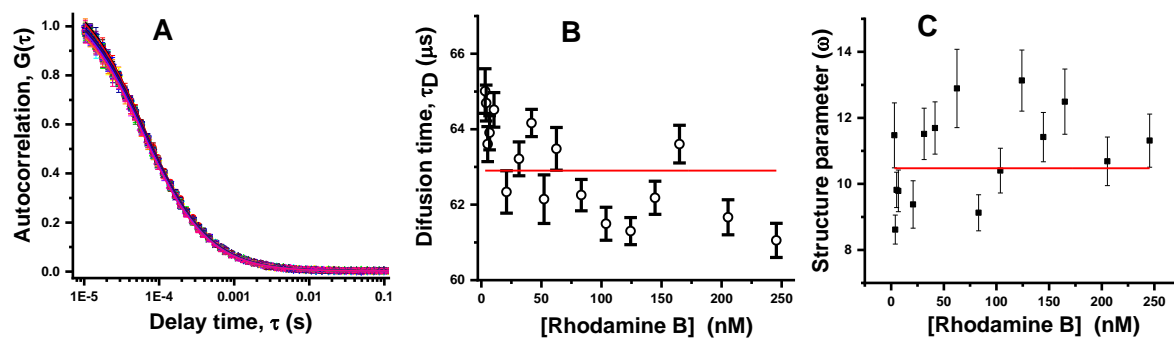

**FIGURE S6:** FCS measurements over a range of concentration of the rhodamine B. A) Normalized autocorrelation data (symbols) with fits (solid lines) using eq. 3, B) Diffusion time,  $\tau_D$  and C) structure parameter ( $\omega = \sigma_z/\sigma_r$ ) obtained from 3-250 nM aqueous solution of the fluorophore. The solid lines in (B) and (C) correspond to the weighted average of  $\tau_D$  ( $= 63 \mu\text{s}$ ) and  $\omega$  ( $= 10.5$ ) respectively.

*FCS autocorrelation data obtained from different proteins:*

FIGURE S7 shows the autocorrelation (symbols) data from free dye rhodamine B and several different proteins labelled with TMR. The solid lines are fits using single diffusion model (equation 3). The values of  $\tau_D$  obtained from the fits are plotted in Fig. 3 D in the main article. Molecular weight of rhodamine B, TMR-amylin, TMR- $\alpha$ -synuclein, TMR-T4-lysozyme, TMR-Nt-apoE4 and TMR-BSA are 479 Da, 4.3 kDa, 14.4 kDa, 18.6 kDa, 19.7 kDa and 66.5 kDa respectively. All the measurements have been performed at RT.

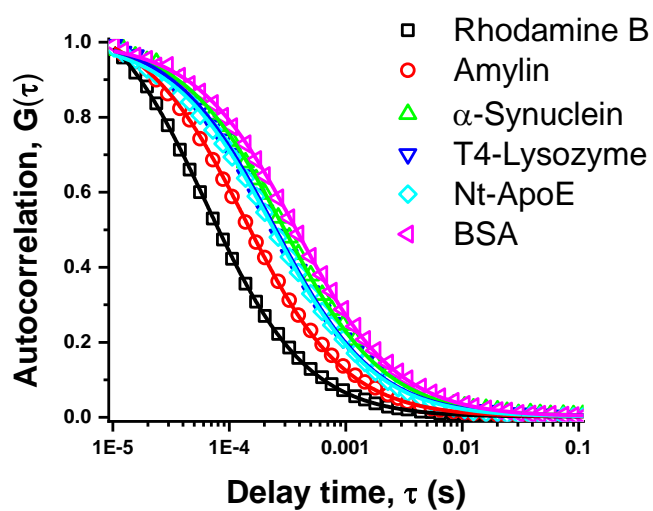

**FIGURE S7:**  $G(\tau)$  obtained from proteins of different molecular weights. Normalized autocorrelation data (symbols) obtained from free rhodamine B and TMR labelled- amylin,  $\alpha$ -synuclein, T4-lysozyme, Nt-apoE4 and BSA. Solid lines are fits using single diffusion model (see Eq. 3).

Comparison of Signal to noise (S/N) of the  $G(\tau)$  data obtained using cuvette-FCS and the PicoQuant FCS:

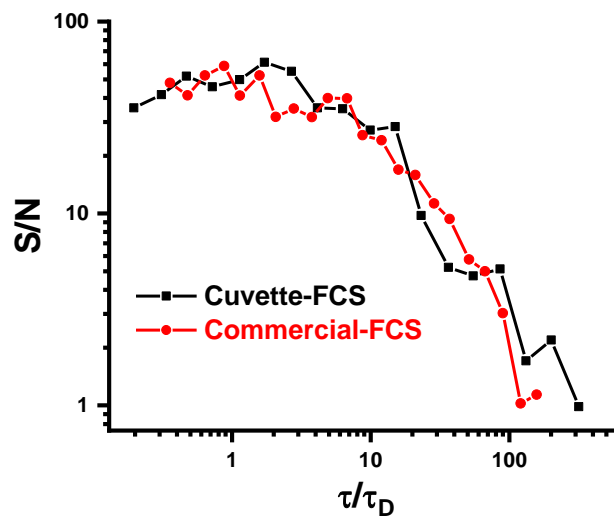

**FIGURE S8:** Comparison of S/N between a commercial microscope-based and cuvette- FCS. FCS measurements have been performed using 20 nM rhodamine B and 28  $\mu$ W laser power. The black and the red lines correspond to S/N obtained using cuvette-FCS and the PicoQuant FCS respectively. Clearly, S/N are similar between the two setups.

*Cuvette-FCS measurements at different temperatures:*

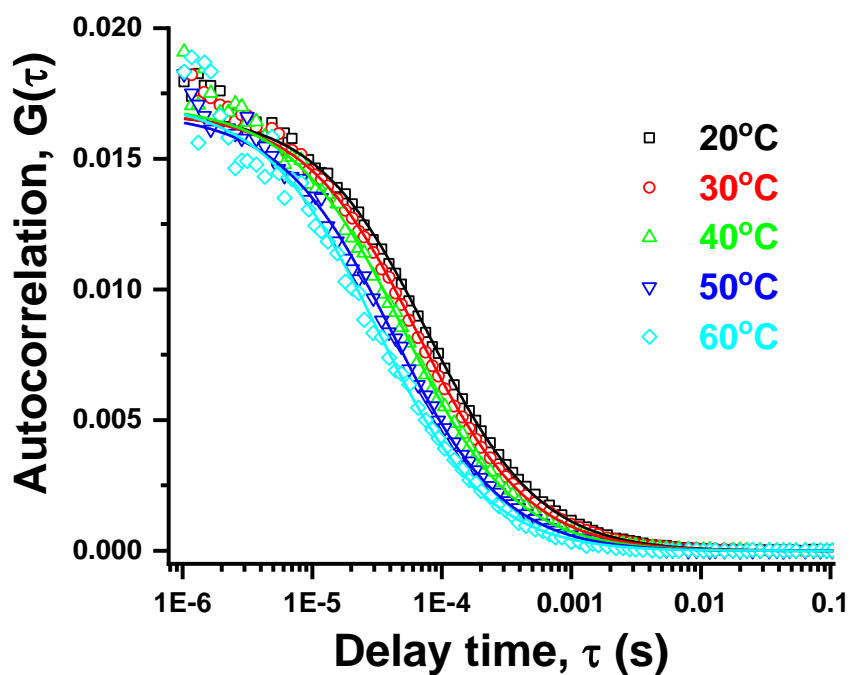

**FIGURE S9:**  $G(\tau)$  data obtained from 50 nM rhodamine B in PBS at different temperatures. The symbols represent data and the solid lines are fits using single component diffusion (see Eq. 3). Clearly, amplitudes of the  $G(\tau)$  remain almost constant over the entire range of temperature. The  $G(\tau)$  curves shift towards longer delay time at lower temperature indicating longer diffusion times at lower temperatures due to higher viscosity of water. Some of the measured  $G(\tau)$  curves have been omitted here for clarity of the presentation.

FCS measurements of rhodamine B in urea:

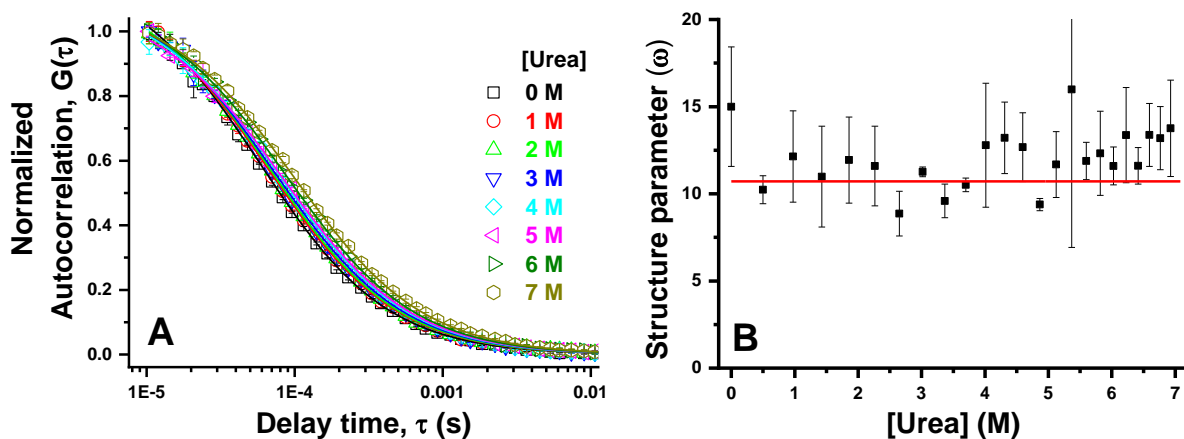

**FIGURE S10:** A) Normalized  $G(\tau)$  data from rhodamine B in different concentrations of urea in PBS at RT. The symbols are data and the solid lines are fits with single component diffusion (see Eq. 3). Clearly, the  $G(\tau)$  curves shift towards longer delay time at higher concentrations of urea indicating longer diffusion times at higher urea concentrations due to increase of viscosity of the solution. Some of the measured  $G(\tau)$  have been omitted here for clarity of presentation. B) Structure parameter ( $\omega = \sigma_z/\sigma_r$ ) obtained from fitting of  $G(\tau)$  data at different concentration of urea. The symbols represent data and the solid line the weighted mean of  $\omega$  (mean = 10.1).



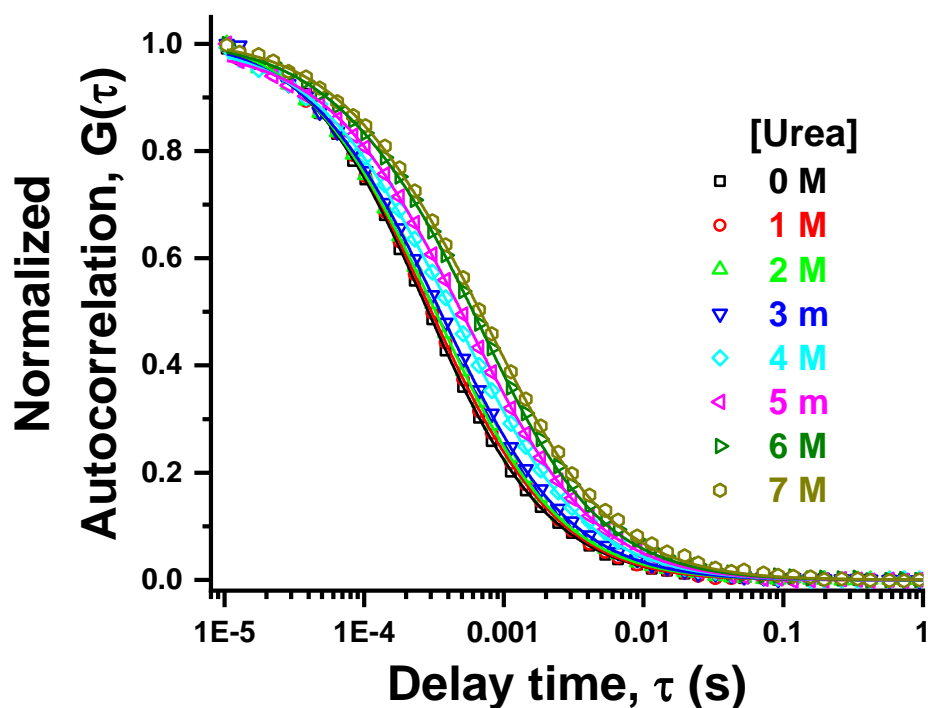

**FIGURE S11:** Normalized  $G(\tau)$  data obtained from unfolding of TMR labeled Nt-ApoE4 in different concentrations of urea in PBS at RT. The symbols represent data and the solid lines are fits with single component diffusion (see Eq. 3). The  $G(\tau)$  curves shift towards longer delay time at higher concentrations of urea indicating longer diffusion times at higher urea concentrations due to increase of viscosity of the solution and as well as unfolding. Figure 7 in the main article show that increase of  $\tau_D$  is sigmoidal consistent with cooperative unfolding of the protein. Some of the measured  $G(\tau)$  have been omitted here for clarity of presentation.

**Table S1: Summary of the stability parameters for unfolding of Nt-apoE4 in urea.** The unfolding data presented in Fig. 7 B in the main article are fit using 2-state model (1).

| Measured by | $\Delta G$ (kCal/mol) | $m$ (kCal/L)    | Denaturation midpoint<br>(mol/L of urea) |
|-------------|-----------------------|-----------------|------------------------------------------|
| CD          | $3.3 \pm 0.2$         | $0.77 \pm 0.08$ | $4.24 \pm 0.1$                           |
| Cuvette-FCS | $3.3 \pm 0.4$         | $0.95 \pm 0.14$ | $3.51 \pm 0.1$                           |

#### REFERENCES:

1. Santoro, M. M., and D. W. Bolen. 1988. Unfolding free energy changes determined by the linear extrapolation method. 1. Unfolding of phenylmethanesulfonyl .alpha.-chymotrypsin using different denaturants. *Biochemistry* 27:8063-8068.
